# Supplementary material for: Psychological impact of COVID-19 amongst pregnant women in Conakry, Guinea. A cross-sectional study.
Source: Research Square preprint supplement (doi:10.21203/rs.3.rs-122687/v1), 2020-12-22
Supplement: Supplementary file 2 [file 365a71acbb58fcbe88e31a60.xlsx]

## Sheet: Feuil1
								Psychological impact of COVID-19 amongst pregnant women in Conakry, Guinea. A cross-sectional study.
								Author’s Affiliation
								Almamy Amara Touré1 , Abdourahamane Diallo2, Aboubacar Sidiki Magassouba3, Abdoulaye Doumbouya1, Ibrahima Conté2, Gnoume Camara3, Aïssatou Djomboya Diallo4, Mamadou Saliou Diallo4, Abdelkader Barka Ateib1 ,Abdourahim Cissé5, Asmaou Diallo6 ,And Abdoul Habib Beavogui1.
								1 Centre National de Formation et de Recherche en Santé Rurale de Mafèrinyah, Forécariah, Guinée. 2Centre Hospitalo-Universitaire Ignace Deen, Service de Gynécologie, Conakry, Guinée.3 Department of Public Health, Faculty of Health Sciences and Techniques, Gamal Abdel Nasser University, Conakry, Guinea 4. Université Koffi Annan de Guinée, Conakry, Guinée. 5. Sightsavers, Conakry,Guinée. 6.Le Fond…
patient_informations/age	patient_informations/statut_matrimonial	patient_informations/commune	patient_informations/niveau_education	patient_informations/Profession	patient_informations/Nbp_menage	patient_informations/Age_gestationnel	patient_informations/desir_grossesse	patient_informations/revenu_mensuel	Antecedents/Gestite	Antecedents/Parite	Antecedents/Vivant	Antecedents/Avortement	Antecedents/Decede	Antecedents/diabete	Antecedents/hta	COVID-19_Connaissances/con_COVID_19	COVID-19_Connaissances/existence_COVID_19	COVID-19_Connaissances/fievre	COVID-19_Connaissances/toux	COVID-19_Connaissances/maux_tete	COVID-19_Connaissances/fatigue	COVID-19_Connaissances/mal_gorge	COVID-19_Connaissances/ecoulement_nasal	COVID-19_Connaissances/diffic_resp	COVID-19_Connaissances/eternuements	COVID-19_Connaissances/agueusie	COVID-19_Connaissances/anosmie	COVID-19_Connaissances/autresigne	COVID-19_Connaissances/autre_signe	Moyens_Transmissions/air_infecte	Moyens_Transmissions/animal_homme	Moyens_Transmissions/homme_homme	Moyens_Transmissions/gout_respirat_expul_toux_eternuement	Moyens_Transmissions/contact_objets_souil_surfaces_souil	Moyens_Transmissions/mains_infect_bouche_nez_yeux	Moyens_Transmissions/mere_enfant	Moyens_Transmissions/autremoytrans	Moyens_Transmissions/autre_moytrans	Moyens_Prevention/evitez_toucher_yeux_nez_bouche	Moyens_Prevention/toussez_coude	Moyens_Prevention/lavage_mains	Moyens_Prevention/port_masque	Moyens_Prevention/distanciation_sociale	Moyens_Prevention/confinement	Moyens_Prevention/autre	Moyens_Prevention/autre_moyen_prevention	source_infos_COVID-19/source_infos/1	source_infos_COVID-19/source_infos/2	source_infos_COVID-19/source_infos/3
17	2	1	1	Profession_liberale	4	5	2	1050000	1	0	0	0	0	2	2	1	1	0	0	0	0	0	0	0	0	0	0	2	n/a	0	0	0	0	0	0	0	2	n/a	0	0	1	1	1	1	n/a	n/a	Yes	No	No
18	1	1	3	Sans_Emploi	3	7	1	0	1	0	0	0	0	2	2	1	1	0	0	0	0	0	0	0	0	0	0	n/a	n/a	1	1	1	1	1	1	1	n/a	n/a	1	1	1	1	1	1	n/a	n/a	No	No	No
25	1	1	4	Sans_Emploi	3	8	1	1050000	1	0	0	0	0	2	2	1	1	1	1	1	1	1	1	1	1	1	1	1	n/a	1	1	1	1	1	1	1	n/a	n/a	1	1	1	1	1	1	1	n/a	No	No	No
24	1	1	4	Sans_Emploi	2	4	1	3000000	1	0	0	0	0	2	2	1	1	1	1	1	1	1	1	1	1	1	1	1	n/a	1	1	1	1	1	1	1	n/a	n/a	1	1	1	1	1	1	1	n/a	No	No	No
20	1	1	4	Sans_Emploi	9	5	1	0	1	0	0	0	0	2	2	1	1	1	1	1	1	1	1	1	1	1	1	1	n/a	1	1	1	1	1	1	1	n/a	n/a	1	1	1	1	1	1	n/a	n/a	No	No	No
26	1	3	4	Sans_Emploi	8	32	1	0	1	0	0	0	0	2	2	1	1	1	1	1	1	1	1	1	1	1	1	2	n/a	1	0	1	1	1	1	1	2	n/a	1	1	1	1	1	1	2	n/a	Yes	No	No
27	2	3	4	Sans_Emploi	4	32	2	0	1	0	0	0	0	1	2	1	1	1	1	1	1	1	1	1	1	1	1	2	n/a	1	1	1	1	1	1	1	2	n/a	1	1	1	1	1	1	2	n/a	No	No	No
19	1	1	1	Profession_liberale	6	4	1	1500000	1	0	0	0	0	2	2	1	2	0	0	0	0	0	0	0	0	0	0	2	n/a	0	0	0	0	0	0	0	n/a	n/a	0	0	1	1	0	1	n/a	n/a	Yes	No	No
20	1	2	2	Sans_Emploi	2	8	1	0	1	0	0	0	0	2	2	1	1	0	0	0	0	0	0	0	0	0	0	n/a	n/a	0	0	0	0	0	0	0	2	n/a	0	0	0	0	0	0	n/a	n/a	No	No	No
23	2	3	1	Sans_Emploi	8	32	1	0	1	0	0	0	0	2	2	1	1	1	1	0	0	1	1	0	0	0	0	2	n/a	1	0	1	0	0	0	0	2	n/a	0	0	1	1	0	0	2	n/a	No	No	No
30	2	3	1	Sans_Emploi	9	24	1	0	1	0	0	0	0	2	2	1	1	1	1	1	1	1	1	0	0	0	0	2	n/a	1	0	1	0	0	0	0	2	n/a	0	0	1	1	0	0	2	n/a	No	No	No
18	1	2	1	Sans_Emploi	4	7	1	1200000	1	0	0	0	0	2	2	1	1	0	0	1	1	1	1	1	1	0	0	2	n/a	1	0	1	0	1	0	0	2	n/a	0	0	1	1	1	1	2	n/a	No	No	No
30	1	2	5	Sans_Emploi	2	6	1	900000	1	0	0	0	0	2	2	1	1	1	1	1	0	1	1	1	1	0	0	2	n/a	1	0	1	1	1	1	0	2	n/a	1	1	1	1	1	1	2	n/a	No	No	No
23	1	2	4	Sans_Emploi	2	6	1	900000	1	0	0	0	0	2	2	1	1	0	1	1	0	0	0	1	1	0	0	2	n/a	1	0	1	1	1	1	0	2	n/a	1	1	1	1	1	1	2	n/a	No	No	No
20	2	1	5	Profession_liberale	11	34	2	100000	1	0	0	0	0	2	2	1	1	1	1	0	0	1	1	0	0	0	0	2	n/a	1	0	1	0	1	1	0	2	n/a	1	0	1	1	0	0	2	n/a	No	No	No
20	1	2	4	Sans_Emploi	5	32	1	0	1	1	0	0	0	2	2	1	1	1	1	1	1	1	1	1	1	1	1	1	Vomissements	1	1	1	1	1	1	1	2	n/a	1	1	1	1	1	1	1	Port de gants	Yes	No	No
20	1	1	3	Sans_Emploi	2	6	1	900000	1	0	0	0	0	2	2	1	1	1	1	1	1	1	1	1	1	1	1	1	n/a	1	1	1	1	1	1	1	1	n/a	1	1	1	1	1	1	1	n/a	Yes	No	No
21	2	3	3	Employe_Prive	3	28	2	NA	1	0	0	0	0	2	2	1	1	1	1	1	1	1	1	1	0	0	0	1	Vomissements	1	0	1	1	1	1	0	2	n/a	1	1	1	1	1	1	1	Port de gant	No	No	No
19	1	3	2	Sans_Emploi	9	15	1	0	1	0	0	0	0	2	2	1	1	1	1	1	1	1	1	1	1	1	1	2	n/a	1	1	1	1	1	1	1	2	n/a	1	1	1	1	1	1	2	n/a	Yes	Yes	No
25	2	2	4	Sans_Emploi	7	24	1	0	1	0	0	0	0	2	2	1	1	1	1	1	1	1	1	1	0	0	0	2	n/a	1	1	1	1	1	1	0	2	n/a	1	1	1	1	1	1	2	n/a	Yes	No	No
19	2	1	1	Sans_Emploi	8	28	1	0	1	0	0	0	0	2	2	1	1	1	1	1	1	1	1	1	1	0	0	2	n/a	1	0	1	1	1	1	0	2	n/a	1	1	1	1	1	1	2	n/a	Yes	No	No
19	1	3	5	Profession_liberale	6	36	1	200000	1	0	0	0	0	2	2	1	1	1	1	1	1	1	1	1	1	0	0	2	n/a	1	1	1	1	1	1	0	2	n/a	1	1	1	1	1	1	2	n/a	No	No	No
21	1	3	5	Profession_liberale	6	36	1	300000	1	0	0	0	0	2	2	1	1	1	1	1	1	1	1	1	1	0	0	2	n/a	1	1	1	1	1	1	0	2	n/a	1	1	1	1	1	1	2	n/a	No	No	No
20	1	2	1	Profession_liberale	2	9	1	900000	1	0	0	0	0	2	2	1	1	1	1	1	1	1	1	0	1	0	0	2	n/a	1	0	1	1	1	1	1	2	n/a	1	0	1	1	1	0	2	n/a	No	No	No
25	1	2	3	Sans_Emploi	3	5	1	900000	1	0	0	0	0	2	2	1	1	1	0	1	1	1	1	1	1	1	1	2	n/a	1	1	1	1	1	1	1	2	n/a	1	1	1	1	1	1	2	n/a	No	No	No
24	1	2	4	Sans_Emploi	2	5	1	900000	1	0	0	0	0	2	2	1	1	1	1	1	1	1	1	1	1	1	1	2	n/a	1	0	1	1	1	1	1	2	n/a	1	1	1	1	1	1	2	n/a	Yes	No	No
17	1	2	3	Sans_Emploi	3	4	1	900000	1	0	0	0	0	2	2	1	1	1	1	1	1	0	1	1	1	0	0	2	n/a	1	0	1	1	1	1	1	2	n/a	1	0	1	1	1	1	2	n/a	No	No	No
20	1	2	3	Profession_liberale	8	8	1	1200000	1	0	0	0	0	2	2	1	1	1	1	1	1	0	1	1	1	0	0	2	n/a	1	0	1	1	1	1	1	2	n/a	1	0	1	1	1	1	2	n/a	No	No	No
15	2	3	3	Profession_liberale	7	15	2	0	1	0	0	0	0	2	2	1	1	1	1	1	1	1	1	1	1	1	1	2	n/a	1	1	1	1	1	1	1	2	n/a	1	1	1	1	1	1	2	n/a	No	No	Yes
15	2	4	2	Sans_Emploi	16	20	2	0	1	0	0	0	0	2	2	1	1	1	1	1	1	1	1	1	1	0	0	2	n/a	1	1	1	1	1	1	0	2	n/a	1	1	1	1	1	1	2	n/a	Yes	No	No
23	2	3	3	Sans_Emploi	9	24	2	0	1	0	0	0	0	2	2	1	1	1	1	1	1	1	1	1	1	1	1	2	n/a	1	1	1	1	1	1	1	2	n/a	1	1	1	1	1	1	2	n/a	No	No	No
20	2	3	3	Sans_Emploi	7	32	2	120000	1	0	0	0	0	2	2	1	1	1	1	1	1	1	1	1	1	0	0	2	n/a	1	0	1	1	1	1	1	2	n/a	1	1	1	1	1	1	2	n/a	No	No	No
19	1	1	3	Sans_Emploi	3	7	1	900000	1	0	0	0	0	2	2	1	1	1	1	1	1	1	1	1	1	1	1	n/a	n/a	1	1	1	1	1	1	1	n/a	n/a	1	1	1	1	1	1	n/a	n/a	No	No	No
23	1	1	3	Profession_liberale	4	4	1	3600000	1	0	0	0	0	2	2	1	1	1	1	1	1	1	1	1	1	1	1	n/a	n/a	1	0	1	1	1	1	0	n/a	n/a	1	1	1	1	1	1	n/a	n/a	No	No	No
25	2	1	3	Profession_liberale	7	8	2	1200000	1	0	0	0	0	2	2	1	1	1	1	1	1	1	1	1	1	1	1	n/a	n/a	1	0	0	0	0	0	0	n/a	n/a	1	1	1	1	1	1	n/a	n/a	Yes	No	No
18	1	2	1	Profession_liberale	2	8	1	900000	1	0	0	0	0	2	2	1	1	1	0	0	0	0	1	1	0	0	0	2	n/a	1	0	1	1	0	0	0	2	n/a	0	1	1	1	1	1	2	n/a	No	No	No
16	1	2	3	Sans_Emploi	10	5	1	1500000	1	0	0	0	0	2	2	1	1	0	1	1	0	0	0	0	0	0	0	2	n/a	1	0	1	1	1	0	0	2	n/a	0	1	1	1	1	1	2	n/a	No	No	No
22	2	1	3	Sans_Emploi	8	36	1	0	1	0	0	0	0	2	2	1	1	1	1	1	0	1	1	1	0	0	0	2	n/a	1	0	1	1	1	1	0	2	n/a	1	1	1	1	1	1	2	n/a	Yes	No	No
28	1	2	1	Sans_Emploi	2	5	1	900000	1	0	0	0	0	2	2	1	1	1	1	1	0	0	1	1	1	0	0	2	n/a	1	0	1	1	1	1	1	2	n/a	1	1	1	1	1	1	2	n/a	No	No	No
19	1	2	1	Sans_Emploi	3	9	1	900000	1	0	0	0	0	2	2	1	1	1	1	1	0	0	1	1	1	0	0	2	n/a	1	0	1	1	1	1	0	2	n/a	1	0	1	1	1	1	2	n/a	Yes	No	No
25	1	2	4	Profession_liberale	2	6	1	1200000	1	0	0	0	0	2	2	1	1	1	1	1	0	1	1	1	1	1	1	2	n/a	1	0	1	1	1	1	1	2	n/a	1	1	1	1	1	1	2	n/a	No	No	No
25	1	2	5	Sans_Emploi	2	7	1	1200000	1	0	0	0	0	2	2	1	1	1	1	1	0	1	1	1	1	0	0	2	n/a	1	1	1	1	1	1	1	2	n/a	1	1	1	1	1	1	2	n/a	No	No	No
19	1	2	1	Sans_Emploi	8	20	1	15000000	1	0	0	0	0	2	2	1	2	1	1	1	0	1	1	1	1	0	0	2	n/a	1	1	1	1	0	1	0	2	n/a	1	0	1	1	1	1	2	n/a	No	No	No
25	2	4	4	Sans_Emploi	7	28	2	0	1	0	0	0	0	2	2	1	1	1	1	1	1	1	1	1	1	1	1	1	Diarrhée vomissements	1	1	1	1	1	1	1	2	n/a	1	1	1	1	1	1	2	n/a	No	No	No
20	1	3	4	Sans_Emploi	8	24	1	0	1	0	0	0	0	2	2	1	1	1	1	1	1	1	1	1	1	1	1	2	n/a	1	1	1	1	1	1	1	2	n/a	1	1	1	1	1	1	2	n/a	No	No	No
22	1	3	4	Sans_Emploi	2	24	1	0	1	0	0	0	0	2	2	1	1	1	1	1	1	1	1	1	1	1	1	2	n/a	1	1	1	1	1	1	1	2	n/a	1	1	1	1	1	1	2	n/a	No	No	No
20	1	3	3	Sans_Emploi	9	15	1	0	1	0	0	0	0	2	2	1	1	1	1	1	1	1	1	1	1	1	1	2	n/a	1	1	1	1	1	1	1	2	n/a	1	1	1	1	1	1	2	n/a	No	No	No
20	1	3	3	Sans_Emploi	5	24	1	0	1	0	0	0	0	2	2	1	1	1	1	1	1	1	1	1	0	0	0	2	n/a	1	1	1	1	1	1	0	2	n/a	1	1	1	1	1	1	2	n/a	No	No	No
22	1	2	4	Sans_Emploi	3	8	1	900000	1	0	0	0	0	2	2	1	1	1	1	1	1	1	1	1	1	1	1	2	n/a	1	0	1	1	1	1	1	2	n/a	1	1	1	1	1	1	2	n/a	No	No	No
18	1	2	3	Sans_Emploi	2	9	1	900000	1	0	0	0	0	2	2	1	1	1	0	0	1	1	1	1	1	0	0	2	n/a	1	0	1	1	1	1	1	2	n/a	1	0	1	1	1	1	2	n/a	No	No	No
19	1	2	2	Sans_Emploi	2	6	1	900000	1	0	0	0	0	2	2	1	1	1	1	0	1	1	0	1	1	0	0	2	n/a	1	0	1	1	1	1	0	2	n/a	1	1	1	1	0	1	2	n/a	No	No	No
30	1	2	4	Sans_Emploi	2	4	1	1200000	1	0	0	0	0	2	2	1	1	1	1	1	1	1	1	1	1	0	0	2	n/a	1	1	1	1	1	1	0	2	n/a	1	1	1	1	1	1	2	n/a	No	No	No
19	1	2	2	Sans_Emploi	2	6	1	1200000	1	0	0	0	0	2	2	1	1	0	1	0	1	0	0	1	1	0	0	2	n/a	1	0	1	1	1	1	1	2	n/a	1	0	1	1	1	1	2	n/a	No	No	No
18	2	3	1	Sans_Emploi	12	28	2	0	1	0	0	0	0	2	2	1	1	1	1	1	1	1	1	0	0	0	0	2	n/a	1	0	1	0	0	1	0	2	n/a	1	1	1	1	1	1	2	n/a	No	No	No
20	2	2	3	Sans_Emploi	3	8	2	1200000	1	0	0	0	0	2	2	1	1	1	1	1	1	0	1	1	1	0	0	2	n/a	1	0	1	1	1	1	1	2	n/a	1	1	1	1	1	1	2	n/a	No	No	No
23	2	2	3	Profession_liberale	10	7	2	1500000	1	0	0	0	0	2	2	1	1	1	1	1	1	1	1	1	1	1	1	2	n/a	1	0	1	1	1	1	0	2	n/a	1	0	1	1	1	1	2	n/a	No	No	No
23	1	1	4	Employe_Prive	2	9	1	1050000	1	0	0	0	0	2	2	1	1	0	0	0	0	0	0	0	0	0	0	2	n/a	0	0	0	0	0	0	0	n/a	n/a	0	1	1	1	1	1	n/a	n/a	No	No	No
16	1	1	1	Profession_liberale	15	8	1	1500000	1	0	0	0	0	2	2	1	1	0	0	0	0	0	0	0	0	0	0	2	n/a	0	0	0	0	0	0	0	n/a	n/a	0	0	1	1	1	1	n/a	n/a	No	No	No
18	1	1	1	Sans_Emploi	6	9	1	0	1	0	0	0	0	2	2	1	1	0	0	0	0	0	0	0	0	0	0	2	n/a	0	0	0	0	0	1	0	n/a	n/a	0	0	0	0	0	0	2	n/a	No	No	No
19	2	1	3	Sans_Emploi	12	6	2	600000	1	0	0	0	0	2	2	1	1	0	0	0	0	0	0	0	0	0	0	2	n/a	0	0	0	0	0	0	0	n/a	n/a	0	1	1	1	1	1	1	n/a	Yes	No	No
29	1	2	1	Sans_Emploi	2	6	1	900000	1	0	0	0	0	2	2	1	1	1	1	1	0	0	0	0	0	0	0	2	n/a	1	0	0	0	0	0	0	2	n/a	0	0	1	1	1	0	2	n/a	No	No	No
23	1	2	3	Sans_Emploi	2	4	1	1000000	1	0	0	0	0	2	2	1	1	1	0	0	0	0	1	0	0	0	0	2	n/a	1	0	1	1	0	0	0	2	n/a	0	1	1	1	1	1	2	n/a	Yes	No	No
31	1	2	4	Employe_Prive	2	5	1	1500000	1	0	0	0	0	2	2	1	1	0	1	1	0	0	0	0	1	0	0	2	n/a	1	0	1	1	0	0	0	2	n/a	0	0	1	1	0	0	2	n/a	Yes	No	No
20	2	2	3	Sans_Emploi	10	5	2	1200000	1	0	0	0	0	2	2	1	1	0	0	0	0	0	1	1	0	0	0	2	n/a	1	0	1	1	1	0	0	2	n/a	0	1	1	1	1	1	2	n/a	No	No	No
18	1	2	1	Profession_liberale	2	6	1	900000	1	0	0	0	0	2	2	1	1	1	1	1	1	0	0	0	0	0	0	2	n/a	1	0	1	1	1	1	0	2	n/a	0	0	1	1	0	0	2	n/a	No	No	No
19	1	2	2	Profession_liberale	2	9	1	900000	1	0	0	0	0	2	2	1	1	1	1	1	1	1	0	1	1	0	0	2	n/a	1	0	1	1	0	0	1	2	n/a	0	0	1	1	1	1	2	n/a	No	No	No
22	1	2	4	Sans_Emploi	3	6	1	900000	1	0	0	0	0	2	2	1	1	1	1	1	1	1	1	1	1	0	0	2	n/a	1	0	1	1	1	1	1	2	n/a	0	1	1	1	1	1	2	n/a	No	No	No
15	1	2	3	Sans_Emploi	2	4	1	900000	1	0	0	0	0	2	2	1	1	1	1	0	1	0	1	0	0	0	0	2	n/a	1	0	1	1	0	0	0	2	n/a	0	0	1	1	1	1	2	n/a	No	No	No
20	1	2	3	Sans_Emploi	2	5	1	900000	1	0	0	0	0	2	2	1	1	1	1	1	1	1	1	1	1	0	0	2	n/a	1	0	1	1	1	1	1	2	n/a	0	0	1	1	1	1	2	n/a	No	No	No
22	1	1	3	Sans_Emploi	12	9	1	0	1	0	0	0	0	2	2	1	1	1	1	1	1	1	1	1	1	1	1	n/a	n/a	1	1	1	1	1	1	1	n/a	n/a	0	1	1	1	1	1	n/a	n/a	No	No	No
16	1	1	2	Sans_Emploi	10	6	1	1500000	1	0	0	0	0	2	2	1	1	0	0	0	0	0	0	0	0	0	0	2	n/a	0	0	0	0	0	0	0	n/a	n/a	1	1	1	1	1	1	n/a	n/a	Yes	No	No
20	1	2	1	Sans_Emploi	5	8	1	1500000	1	0	0	0	0	2	2	1	1	0	1	0	0	0	0	0	1	0	0	2	n/a	0	0	1	1	1	1	0	2	n/a	1	0	1	1	1	0	2	n/a	No	No	No
25	2	1	4	Sans_Emploi	9	8	2	900000	1	0	0	0	0	2	2	1	1	0	0	0	0	0	0	0	0	0	0	2	n/a	0	0	0	0	0	0	0	n/a	n/a	1	1	1	1	1	1	1	n/a	Yes	No	No
18	2	1	3	Sans_Emploi	6	3	2	0	1	0	0	0	0	2	2	1	2	0	0	0	0	0	0	0	0	0	0	2	n/a	0	0	0	1	1	1	1	n/a	n/a	1	1	1	1	1	1	n/a	n/a	No	No	No
18	1	1	3	Sans_Emploi	5	8	1	900000	1	0	0	0	0	2	2	1	1	0	0	0	0	0	0	0	0	0	0	n/a	n/a	0	0	0	1	1	1	0	n/a	n/a	1	1	1	1	1	1	n/a	n/a	No	No	No
19	1	1	3	Sans_Emploi	2	5	1	1050000	1	0	0	0	0	2	2	1	1	1	0	0	0	0	0	0	0	0	0	n/a	n/a	0	0	0	0	0	0	0	n/a	n/a	1	1	1	1	1	1	n/a	n/a	Yes	No	No
18	2	2	3	Sans_Emploi	4	3	2	900000	1	0	0	0	0	2	2	1	1	1	1	0	1	0	0	0	0	0	0	2	n/a	0	0	0	1	1	1	0	2	n/a	1	1	1	1	1	1	2	n/a	No	No	No
22	2	2	3	Sans_Emploi	6	7	2	1200000	1	0	0	0	0	2	2	1	1	1	1	1	1	0	1	1	1	1	1	2	n/a	0	0	1	1	1	1	0	2	n/a	1	1	1	1	1	1	2	n/a	No	No	No
19	1	2	1	Profession_liberale	2	6	1	900000	1	0	0	0	0	2	2	1	1	1	1	1	0	0	1	1	1	0	0	2	n/a	1	0	1	1	1	1	1	2	n/a	1	0	1	1	1	1	2	n/a	No	No	No
18	1	2	2	Profession_liberale	2	6	1	900000	1	0	0	0	0	2	2	1	1	1	1	1	0	0	1	0	0	0	0	2	n/a	1	0	1	1	1	1	0	2	n/a	1	0	1	1	0	1	2	n/a	No	No	No
22	1	1	1	Sans_Emploi	3	7	1	900000	1	0	0	0	0	2	2	1	1	0	0	0	0	0	0	0	0	0	0	2	n/a	1	0	1	1	1	1	1	n/a	n/a	1	1	1	1	1	1	n/a	n/a	No	No	No
25	1	2	4	Sans_Emploi	2	8	1	900000	1	0	0	0	0	2	2	1	1	1	0	0	0	0	0	0	0	0	0	2	n/a	1	0	1	1	1	1	1	2	n/a	1	0	1	1	1	1	2	n/a	No	No	No
19	1	2	3	Sans_Emploi	2	7	1	900000	1	0	0	0	0	2	2	1	1	1	1	1	0	1	0	0	1	1	1	2	n/a	1	0	1	1	0	1	0	2	n/a	1	0	1	1	1	1	2	n/a	No	No	No
21	1	2	3	Sans_Emploi	2	5	1	900000	1	0	0	0	0	2	2	1	1	1	1	1	0	0	1	1	0	0	0	2	n/a	1	1	1	1	1	1	0	2	n/a	1	1	1	1	1	1	2	n/a	No	No	No
22	1	2	3	Sans_Emploi	2	5	1	900000	1	0	0	0	0	2	2	1	1	1	1	1	0	1	1	1	1	0	0	2	n/a	1	0	1	1	1	1	1	2	n/a	1	0	1	1	1	1	2	n/a	No	No	No
17	1	2	3	Sans_Emploi	2	5	1	900000	1	0	0	0	0	2	2	1	1	0	1	0	0	0	1	1	1	0	0	2	n/a	1	0	1	1	1	1	1	2	n/a	1	0	1	1	0	1	2	n/a	No	No	No
25	1	2	4	Sans_Emploi	3	5	1	1200000	1	0	0	0	0	2	2	1	1	1	1	1	0	0	1	1	0	0	0	2	n/a	1	0	1	1	1	1	0	2	n/a	1	1	1	1	1	1	2	n/a	No	No	No
30	1	2	3	Sans_Emploi	3	4	1	1200000	1	0	0	0	0	2	2	1	1	1	1	1	0	1	1	1	1	0	0	2	n/a	1	0	1	1	1	1	1	2	n/a	1	1	1	1	1	1	2	n/a	No	No	No
19	1	1	2	Profession_liberale	7	7	1	NA	1	0	0	0	0	2	2	1	1	0	0	0	0	0	0	0	0	0	0	2	n/a	1	1	1	1	1	1	1	n/a	n/a	1	1	1	1	1	1	1	n/a	No	No	No
18	1	2	3	Sans_Emploi	15	7	1	0	1	0	0	0	0	2	2	1	1	0	1	1	0	1	0	0	1	0	0	2	n/a	1	0	1	1	1	1	1	2	n/a	1	0	1	1	1	1	2	n/a	No	No	No
15	2	2	3	Sans_Emploi	2	8	2	900000	1	0	0	0	0	2	2	1	1	1	1	1	0	1	1	1	1	0	0	2	n/a	1	0	1	1	1	1	1	2	n/a	1	0	1	1	1	1	2	n/a	No	No	No
19	2	2	2	Profession_liberale	5	8	2	1200000	1	0	0	0	0	2	2	1	1	1	1	1	0	0	1	1	1	0	0	2	n/a	1	0	1	1	1	1	1	2	n/a	1	0	1	1	1	1	2	n/a	Yes	No	No
19	1	1	3	Sans_Emploi	6	8	1	1050000	1	0	0	0	0	2	2	1	1	0	0	0	0	0	0	0	0	0	0	n/a	n/a	1	1	1	1	1	1	1	n/a	n/a	1	0	1	1	1	1	1	n/a	No	No	No
18	1	1	2	Sans_Emploi	7	6	1	0	1	0	0	0	0	2	2	1	1	0	0	0	0	0	0	0	0	0	0	n/a	n/a	1	0	1	1	1	1	0	n/a	n/a	1	1	1	1	1	1	n/a	n/a	No	No	No
20	2	1	4	Sans_Emploi	4	2	2	1500000	1	0	0	0	0	2	2	1	1	1	1	0	0	1	1	1	1	0	0	n/a	n/a	1	1	1	1	1	1	0	n/a	n/a	1	1	1	1	1	1	n/a	n/a	No	No	No
20	1	1	3	Sans_Emploi	2	8	1	600000	1	0	0	0	0	2	2	1	1	1	1	1	1	1	1	1	1	1	1	1	n/a	1	1	1	1	1	1	1	1	n/a	1	1	1	1	1	1	1	n/a	No	No	No
15	1	1	1	Sans_Emploi	2	7	1	600000	1	0	0	0	0	2	2	1	1	1	1	1	1	1	1	1	1	1	1	1	n/a	1	1	1	1	1	1	1	1	n/a	1	1	1	1	1	0	1	n/a	No	No	No
23	1	2	4	Employe_Prive	2	8	1	600000	1	0	0	0	0	2	2	1	1	1	1	1	1	1	1	1	1	1	1	1	n/a	1	1	1	1	1	1	1	n/a	n/a	1	1	1	1	1	1	n/a	n/a	No	No	No
20	1	1	3	Sans_Emploi	11	9	1	900000	1	0	0	0	0	2	2	1	1	1	1	1	1	1	1	1	1	1	1	1	n/a	1	1	1	1	1	1	1	1	n/a	1	1	1	1	1	1	1	n/a	Yes	No	No
19	1	1	3	Sans_Emploi	2	1	1	900000	1	0	0	0	0	2	2	1	1	1	1	1	1	1	1	1	1	1	1	1	n/a	1	1	1	1	1	1	1	n/a	n/a	1	1	1	1	1	1	1	n/a	No	No	No
20	1	1	2	Profession_liberale	2	2	1	1500000	1	0	0	0	0	2	2	1	1	1	1	1	1	1	1	1	1	1	1	1	n/a	1	1	1	1	1	1	1	n/a	n/a	1	1	1	1	1	1	1	n/a	No	No	No
20	1	1	1	Sans_Emploi	5	7	1	1500000	1	0	0	0	0	2	2	1	1	1	1	1	1	1	1	1	1	1	1	1	n/a	1	1	1	1	1	1	1	n/a	n/a	1	1	1	1	1	1	1	n/a	No	No	No
31	1	1	4	Fonctionnaire	5	4	1	1900000	1	0	0	0	0	2	2	1	1	1	1	1	1	1	1	1	1	1	1	1	n/a	1	1	1	1	1	1	1	n/a	n/a	1	1	1	1	1	1	1	n/a	No	No	No
20	1	1	4	Sans_Emploi	8	7	1	3000000	1	0	0	0	0	2	2	1	1	1	1	1	1	1	1	1	1	1	1	1	n/a	1	1	1	1	1	1	1	1	n/a	1	1	1	1	1	1	1	n/a	No	No	No
18	1	1	1	Profession_liberale	6	7	1	NA	1	0	0	0	0	2	2	1	1	1	0	1	1	1	1	1	0	1	1	1	n/a	1	1	1	1	1	1	1	n/a	n/a	1	1	1	1	1	1	n/a	n/a	No	No	No
20	1	2	3	Sans_Emploi	6	8	1	0	1	0	0	0	0	2	1	1	1	1	1	1	1	1	1	1	1	1	1	1	n/a	1	1	1	1	1	1	1	n/a	n/a	1	1	1	1	1	1	1	n/a	No	No	No
17	2	1	3	Sans_Emploi	12	7	2	2400000	1	0	0	0	0	2	2	1	1	1	1	1	1	1	1	1	1	1	1	1	n/a	1	1	1	1	1	1	1	n/a	n/a	1	1	1	1	1	1	n/a	n/a	Yes	No	No
22	2	1	4	Sans_Emploi	5	8	2	0	1	0	0	0	0	2	2	1	1	1	1	1	1	1	1	1	1	1	1	1	n/a	1	1	1	1	1	1	1	n/a	n/a	1	1	1	1	1	1	1	n/a	No	No	No
18	1	3	3	Sans_Emploi	12	15	1	0	1	0	0	0	0	2	2	1	1	1	1	0	1	1	1	1	0	0	0	2	n/a	1	0	1	1	1	1	0	2	n/a	1	1	1	1	1	1	2	n/a	No	No	No
26	1	3	2	Sans_Emploi	8	28	1	0	1	0	0	0	0	2	2	1	1	1	1	1	1	1	1	1	1	1	1	2	n/a	1	1	1	1	1	1	1	2	n/a	1	1	1	1	1	1	2	n/a	No	Yes	No
20	1	3	3	Sans_Emploi	4	24	1	0	1	0	0	0	0	2	2	1	1	1	1	1	1	1	1	1	1	1	1	2	n/a	1	1	1	1	1	1	1	2	n/a	1	1	1	1	1	1	2	n/a	No	No	No
25	1	3	1	Sans_Emploi	13	36	1	0	1	0	0	0	0	2	2	1	1	1	1	1	1	1	1	1	1	0	0	2	n/a	1	1	1	1	1	1	1	2	n/a	1	1	1	1	1	1	2	n/a	No	No	No
25	1	2	4	Employe_Prive	2	32	1	700000	1	0	0	0	0	2	2	1	1	1	1	1	1	1	1	1	1	1	1	2	n/a	1	1	1	1	1	1	1	2	n/a	1	1	1	1	1	1	2	n/a	Yes	No	No
18	1	2	3	Sans_Emploi	2	7	1	750000	1	0	0	0	0	2	2	1	1	1	1	1	1	0	1	1	0	1	1	2	n/a	1	0	1	1	1	1	1	2	n/a	1	1	1	1	1	1	2	n/a	No	No	No
18	1	2	1	Profession_liberale	2	7	1	900000	1	0	0	0	0	2	2	1	1	1	1	1	1	1	1	1	1	0	0	2	n/a	1	0	1	1	1	1	1	2	n/a	1	0	1	1	1	1	2	n/a	No	No	No
23	1	2	3	Profession_liberale	2	6	1	900000	1	0	0	0	0	2	2	1	1	1	1	1	1	0	0	1	1	0	0	2	n/a	1	0	1	1	1	1	1	2	n/a	1	1	1	1	1	1	2	n/a	No	No	No
28	1	2	4	Fonctionnaire	2	6	1	900000	1	0	0	0	0	2	2	1	1	1	1	1	1	1	1	1	1	1	1	2	n/a	1	1	1	1	1	1	1	2	n/a	1	1	1	1	1	1	2	n/a	No	No	No
28	1	1	4	Employe_Prive	2	6	1	900000	1	0	0	0	0	2	2	1	1	1	1	1	1	1	1	1	1	1	1	2	n/a	1	1	1	1	1	1	1	2	n/a	1	1	1	1	1	1	2	n/a	No	No	No
22	1	2	4	Sans_Emploi	2	9	1	900000	1	0	0	0	0	2	2	1	1	1	1	1	1	1	1	1	1	1	1	2	n/a	1	0	1	1	1	1	1	2	n/a	1	0	1	1	1	1	2	n/a	No	No	No
27	1	2	3	Sans_Emploi	2	5	1	900000	1	0	0	0	0	2	2	1	1	1	1	1	1	0	1	1	1	0	0	2	n/a	1	0	1	1	1	1	1	2	n/a	1	1	1	1	1	1	2	n/a	No	No	No
28	1	2	5	Sans_Emploi	2	4	1	900000	1	0	0	0	0	2	2	1	1	1	1	1	1	1	0	1	1	0	0	2	n/a	1	1	1	1	1	1	1	2	n/a	1	1	1	1	1	1	2	n/a	No	No	No
17	1	2	3	Sans_Emploi	2	5	1	900000	1	0	0	0	0	2	2	1	1	1	1	1	1	1	1	1	1	0	0	2	n/a	1	0	1	1	1	1	0	2	n/a	1	0	1	1	1	1	2	n/a	No	No	No
25	1	3	4	Sans_Emploi	2	5	1	900000	1	0	0	0	0	2	2	1	1	1	1	1	1	0	0	1	1	1	1	2	n/a	1	0	1	1	1	1	0	2	n/a	1	1	1	1	1	1	2	n/a	No	No	No
18	1	2	1	Profession_liberale	8	9	1	1200000	1	0	0	0	0	2	2	1	1	1	1	1	1	1	1	1	1	0	0	2	n/a	1	0	1	1	1	1	1	2	n/a	1	0	1	1	0	0	2	n/a	No	No	No
20	1	2	2	Profession_liberale	2	8	1	1200000	1	0	0	0	0	2	2	1	1	1	1	1	1	0	1	1	1	1	1	2	n/a	1	1	1	1	1	1	1	2	n/a	1	1	1	1	1	1	2	n/a	No	No	No
30	1	2	5	Fonctionnaire	4	8	1	1200000	1	0	0	0	0	2	2	1	1	1	1	1	1	1	1	1	1	1	1	2	n/a	1	1	1	1	1	1	1	2	n/a	1	1	1	1	1	1	2	n/a	No	No	No
23	1	2	4	Sans_Emploi	2	4	1	1200000	1	0	0	0	0	2	2	1	1	0	1	1	1	0	0	0	0	0	0	2	n/a	1	0	1	1	1	1	1	2	n/a	1	1	1	1	1	1	2	n/a	No	No	No
24	1	2	4	Sans_Emploi	3	7	1	1200000	1	0	0	0	0	2	2	1	1	1	1	1	1	0	1	1	1	1	1	2	n/a	1	1	1	1	1	1	1	2	n/a	1	1	1	1	1	1	2	n/a	No	No	No
20	1	2	4	Sans_Emploi	2	4	1	1200000	1	0	0	0	0	2	2	1	1	1	1	1	1	1	0	1	1	1	1	2	n/a	1	0	1	1	1	1	1	2	n/a	1	1	1	1	1	1	2	n/a	Yes	No	No
23	1	2	4	Sans_Emploi	2	4	1	1200000	1	0	0	0	0	2	2	1	1	1	1	1	1	1	1	1	1	1	1	2	n/a	1	0	1	1	1	1	1	2	n/a	1	1	1	1	1	1	2	n/a	No	No	No
22	1	2	3	Sans_Emploi	4	8	1	1200000	1	0	0	0	0	2	2	1	1	1	1	1	1	0	1	1	1	0	0	2	n/a	1	0	1	1	1	1	1	2	n/a	1	0	1	1	1	1	2	n/a	No	No	No
27	1	2	4	Sans_Emploi	4	5	1	1200000	1	0	0	0	0	2	2	1	1	1	0	1	1	1	1	1	1	1	1	2	n/a	1	0	1	1	1	1	1	2	n/a	1	1	1	1	1	1	2	n/a	No	No	No
19	1	2	3	Profession_liberale	3	8	1	1500000	1	0	0	0	0	2	2	1	1	1	1	1	1	1	1	1	1	0	0	2	n/a	1	0	1	1	1	1	0	2	n/a	1	1	1	1	1	1	2	n/a	No	No	No
31	1	2	4	Fonctionnaire	3	4	1	1500000	1	0	0	0	0	2	2	1	1	1	1	1	1	1	0	0	0	0	0	2	n/a	1	0	1	1	1	1	1	2	n/a	1	0	1	1	1	1	2	n/a	No	No	No
29	1	2	3	Sans_Emploi	6	4	1	1500000	1	0	0	0	0	2	2	1	1	1	1	1	1	1	1	1	1	1	1	2	n/a	1	0	1	1	1	1	1	2	n/a	1	1	1	1	1	1	2	n/a	No	No	No
32	1	2	4	Profession_liberale	10	7	1	2000000	1	0	0	0	0	2	2	1	1	1	1	1	1	1	1	1	1	0	0	2	n/a	1	1	1	1	1	1	1	2	n/a	1	1	1	1	1	1	2	n/a	No	No	No
22	1	2	3	Sans_Emploi	6	30	1	3000000	1	0	0	0	0	2	2	1	1	1	1	1	1	0	0	1	1	0	0	2	n/a	1	1	1	1	1	1	0	2	n/a	1	1	1	1	1	1	2	n/a	No	No	No
18	2	3	3	Sans_Emploi	8	24	2	0	1	0	0	0	0	2	2	1	1	1	1	1	1	1	1	1	1	1	1	2	n/a	1	1	1	1	1	1	0	2	n/a	1	1	1	1	1	1	2	n/a	No	Yes	No
18	2	2	3	Sans_Emploi	2	9	2	900000	1	0	0	0	0	2	2	1	1	0	1	1	1	0	0	1	1	0	0	2	n/a	1	0	1	1	1	1	1	2	n/a	1	0	1	1	1	1	2	n/a	No	No	No
19	2	2	3	Sans_Emploi	10	5	2	900000	1	0	0	0	0	2	2	1	1	1	1	1	1	1	1	1	1	1	1	2	n/a	1	0	1	1	1	1	1	2	n/a	1	1	1	1	1	1	2	n/a	No	No	No
23	2	2	4	Sans_Emploi	5	7	2	1200000	1	0	0	0	0	2	2	1	1	1	1	1	1	1	1	1	1	1	1	2	n/a	1	0	1	1	1	1	1	2	n/a	1	1	1	1	1	1	2	n/a	No	No	No
19	2	2	3	Sans_Emploi	4	8	2	1200000	1	0	0	0	0	2	2	1	1	0	1	1	1	1	1	1	1	1	1	2	n/a	1	1	1	1	1	1	1	2	n/a	1	0	1	1	1	1	2	n/a	No	No	No
18	2	2	3	Sans_Emploi	5	7	2	1200000	1	0	0	0	0	2	2	1	1	1	1	1	1	0	1	1	1	0	0	2	n/a	1	0	1	1	1	1	1	2	n/a	1	1	1	1	1	1	2	n/a	No	No	No
22	2	2	2	Sans_Emploi	5	7	2	1200000	1	0	0	0	0	2	2	1	1	1	1	1	1	0	1	1	0	0	0	2	n/a	1	0	1	1	1	1	1	2	n/a	1	0	1	1	1	1	2	n/a	No	No	No
25	2	2	5	Sans_Emploi	5	7	2	1200000	1	0	0	0	0	2	2	1	1	1	1	1	1	1	0	1	1	0	0	2	n/a	1	0	1	1	0	1	1	2	n/a	1	1	1	1	1	1	2	n/a	No	No	No
16	2	2	1	Profession_liberale	10	6	2	1500000	1	0	0	0	0	2	2	1	1	1	1	1	1	0	1	1	1	0	0	2	n/a	1	0	1	1	1	1	1	2	n/a	1	1	1	1	1	1	2	n/a	Yes	No	No
23	2	2	4	Sans_Emploi	10	8	2	1500000	1	0	0	0	0	2	2	1	1	1	1	1	1	0	0	1	1	0	0	2	n/a	1	1	1	1	1	1	0	2	n/a	1	1	1	1	1	1	2	n/a	No	No	No
19	2	2	3	Sans_Emploi	10	8	2	1500000	1	0	0	0	0	2	2	1	1	1	1	1	1	0	1	1	1	0	0	2	n/a	1	1	1	1	1	1	1	2	n/a	1	0	1	1	1	1	2	n/a	No	No	No
19	1	1	2	Sans_Emploi	2	7	1	30000	1	0	0	0	0	2	2	1	1	1	1	1	1	1	1	0	1	0	0	n/a	n/a	1	1	1	1	0	1	0	n/a	n/a	1	1	1	1	1	1	n/a	n/a	Yes	No	No
18	1	1	2	Sans_Emploi	2	4	1	30000	1	0	0	0	0	2	2	1	1	1	1	1	1	1	1	1	0	0	1	n/a	n/a	1	0	1	1	1	1	1	n/a	n/a	1	1	1	1	1	1	n/a	n/a	No	No	No
18	1	1	1	Profession_liberale	10	9	1	600000	1	0	0	0	0	2	2	1	1	1	1	1	1	1	1	1	1	1	1	n/a	n/a	1	1	1	1	1	1	1	n/a	n/a	1	0	1	1	1	1	n/a	n/a	Yes	No	Yes
30	1	1	3	Employe_Prive	2	1	1	600000	1	0	0	0	0	2	2	1	1	1	1	1	1	1	1	1	0	0	0	n/a	n/a	1	0	1	1	1	1	0	n/a	n/a	1	1	1	1	1	1	n/a	n/a	No	No	No
18	1	1	2	Profession_liberale	6	7	1	1200000	1	0	0	0	0	2	2	1	1	1	1	1	1	1	1	1	1	0	1	n/a	n/a	1	1	1	1	1	1	0	1	n/a	1	1	1	1	1	1	1	n/a	Yes	No	No
26	1	1	4	Fonctionnaire	2	8	1	1200000	1	0	0	0	0	2	2	1	1	1	1	1	1	1	1	1	1	1	1	n/a	n/a	1	1	1	1	1	1	1	n/a	n/a	1	1	1	1	1	1	n/a	n/a	No	No	No
23	1	1	3	Profession_liberale	2	8	1	1200000	1	0	0	0	0	2	2	1	1	1	0	1	1	1	1	1	1	1	0	n/a	n/a	1	1	1	1	1	1	1	n/a	n/a	1	1	1	1	1	1	n/a	n/a	Yes	No	No
18	1	1	3	Sans_Emploi	12	6	1	0	1	0	0	0	0	2	2	1	1	1	1	1	1	1	1	1	1	1	1	n/a	n/a	1	1	1	1	1	1	1	n/a	n/a	1	1	1	1	1	1	n/a	n/a	No	No	No
20	1	1	3	Sans_Emploi	6	6	1	0	1	0	0	0	0	2	2	1	1	1	1	1	1	1	1	1	1	1	1	n/a	n/a	1	1	1	1	1	1	1	n/a	n/a	1	1	1	1	1	1	1	n/a	No	No	No
20	1	1	2	Sans_Emploi	2	1	1	0	1	0	0	0	0	2	2	1	1	1	1	1	1	0	1	1	0	0	0	n/a	n/a	1	0	1	1	1	1	0	n/a	n/a	1	1	1	1	1	1	n/a	n/a	No	No	No
24	1	1	4	Sans_Emploi	10	7	1	0	1	0	0	0	0	2	2	1	1	1	1	1	1	1	1	1	1	1	1	n/a	n/a	1	1	1	1	1	1	1	n/a	n/a	1	1	1	1	1	1	1	n/a	Yes	No	No
28	1	1	3	Sans_Emploi	2	4	1	0	1	0	0	0	0	2	2	1	1	1	1	1	1	1	1	1	1	1	1	n/a	n/a	1	1	1	1	1	1	1	1	n/a	1	1	1	1	1	1	1	n/a	No	No	No
21	1	2	3	Sans_Emploi	3	8	1	0	1	0	0	0	0	2	2	1	1	1	1	1	1	1	1	1	1	1	1	n/a	n/a	1	1	1	1	1	1	1	n/a	n/a	1	1	1	1	1	1	1	n/a	No	No	No
20	1	1	3	Profession_liberale	6	8	1	0	1	0	0	0	0	2	2	1	1	1	1	1	1	1	1	1	1	1	1	n/a	n/a	1	1	1	1	1	1	1	n/a	n/a	1	1	1	1	1	1	n/a	n/a	No	No	No
20	2	1	4	Sans_Emploi	10	6	2	900000	1	0	0	0	0	2	2	1	1	1	1	1	1	1	1	1	1	1	1	n/a	n/a	1	1	0	1	1	1	1	n/a	n/a	1	1	1	1	1	1	n/a	n/a	Yes	No	No
20	2	1	3	Sans_Emploi	8	6	2	1200000	1	0	0	0	0	2	2	1	1	1	1	1	1	1	1	1	1	0	0	n/a	n/a	1	1	1	1	1	1	0	n/a	n/a	1	1	1	1	1	1	n/a	n/a	No	No	No
20	2	1	3	Employe_Prive	6	3	2	0	1	0	0	0	0	2	2	1	1	1	1	1	1	1	1	1	1	1	1	n/a	n/a	1	1	1	1	1	1	1	n/a	n/a	1	1	1	1	1	1	1	n/a	No	No	No
19	1	2	1	Profession_liberale	2	8	1	900000	1	0	0	0	0	2	2	1	1	1	1	0	0	0	1	0	1	0	0	2	n/a	1	0	1	1	1	1	0	2	n/a	0	1	1	1	1	1	2	n/a	No	No	No
27	1	2	1	Sans_Emploi	2	4	1	900000	1	0	0	0	0	2	2	1	1	0	1	1	0	0	1	1	1	0	0	2	n/a	0	0	1	1	1	1	1	2	n/a	1	1	1	1	1	1	2	n/a	No	No	No
24	1	1	4	Sans_Emploi	20	6	1	900000	1	0	0	0	0	2	2	1	1	1	1	1	1	1	1	1	1	1	1	n/a	n/a	0	0	1	1	1	1	0	n/a	n/a	1	1	1	1	1	1	n/a	n/a	Yes	No	Yes
30	1	2	3	Profession_liberale	2	6	1	900000	1	0	0	0	0	2	2	1	1	1	1	1	0	1	1	1	1	0	1	2	n/a	1	0	1	1	1	1	1	2	n/a	1	1	1	1	1	1	2	n/a	No	No	No
25	1	2	3	Profession_liberale	2	4	1	900000	1	0	0	0	0	2	2	1	1	0	1	1	0	0	1	1	1	0	0	2	n/a	1	0	1	1	1	1	1	2	n/a	1	1	1	1	1	1	2	n/a	No	No	No
19	1	2	1	Profession_liberale	2	4	1	900000	1	0	0	0	0	2	2	1	1	1	1	0	0	0	1	1	1	0	0	2	n/a	1	0	1	1	1	1	0	2	n/a	1	0	1	1	1	1	2	n/a	Yes	No	No
21	1	2	3	Profession_liberale	2	4	1	900000	1	0	0	0	0	2	2	1	1	1	1	1	0	0	1	1	1	0	0	2	n/a	1	0	0	1	1	1	1	2	n/a	1	0	1	1	1	1	2	n/a	No	No	No
26	1	2	4	Sans_Emploi	2	5	1	1200000	1	0	0	0	0	2	2	1	1	1	1	1	0	1	1	1	1	1	1	2	n/a	1	1	1	1	1	1	1	2	n/a	1	1	1	1	1	1	2	n/a	No	No	No
19	1	1	5	Profession_liberale	2	9	1	NA	1	0	0	0	0	2	2	1	1	0	0	0	0	0	0	0	0	0	0	n/a	n/a	1	1	1	1	1	1	1	n/a	n/a	1	1	1	1	1	1	1	n/a	No	No	No
20	1	1	3	Sans_Emploi	6	8	1	1200000	1	0	0	0	0	2	2	1	1	1	1	1	1	1	1	1	1	1	1	1	n/a	1	1	1	1	1	1	1	n/a	n/a	1	1	1	1	1	1	1	n/a	No	No	No
22	1	1	4	Sans_Emploi	2	7	1	2010000	1	0	0	0	0	2	2	1	1	1	1	1	1	1	1	1	1	1	1	1	n/a	1	1	1	1	1	1	1	n/a	n/a	1	1	1	1	1	1	1	n/a	No	No	No
19	1	1	2	Profession_liberale	6	8	1	NA	1	0	0	0	0	2	2	1	1	1	1	1	1	1	1	1	1	1	1	1	n/a	1	1	1	1	1	1	1	n/a	n/a	1	0	1	1	1	1	1	n/a	No	No	No
24	1	1	4	Fonctionnaire	4	4	1	0	1	0	0	0	0	2	2	1	1	1	1	1	1	1	1	1	1	1	1	1	n/a	1	1	1	1	1	1	1	n/a	n/a	1	1	1	1	1	1	n/a	n/a	No	No	No
28	1	1	4	Sans_Emploi	6	6	1	0	1	0	0	0	0	2	2	1	1	1	1	1	1	1	1	1	1	1	1	1	n/a	1	1	1	1	1	1	1	1	n/a	1	1	1	1	1	1	n/a	n/a	No	No	No
19	2	1	3	Sans_Emploi	15	8	2	2400000	1	0	0	0	0	2	2	1	1	1	1	1	1	1	1	1	1	1	1	1	n/a	1	1	1	1	1	1	1	n/a	n/a	1	1	1	1	1	1	n/a	n/a	No	No	No
19	2	1	5	Fonctionnaire	8	9	2	NA	1	0	0	0	0	2	2	1	1	1	1	1	1	1	1	1	1	1	1	1	n/a	1	1	1	1	1	1	1	n/a	n/a	1	1	1	1	1	1	1	n/a	No	No	No
22	2	3	3	Sans_Emploi	7	28	1	0	1	0	0	0	0	2	2	1	1	1	1	1	1	1	1	1	1	1	1	2	n/a	1	1	1	1	1	1	1	2	n/a	1	1	1	1	1	1	2	n/a	No	No	No
25	1	3	4	Sans_Emploi	5	19	1	0	1	0	0	0	0	2	2	1	1	1	1	1	1	1	1	1	1	1	1	2	n/a	1	1	1	1	1	1	0	2	n/a	1	1	1	1	0	1	2	n/a	Yes	No	No
23	1	2	4	Profession_liberale	2	3	1	900000	1	0	0	0	0	2	2	1	1	1	1	1	1	1	0	1	1	1	1	2	n/a	1	0	1	1	1	1	1	2	n/a	1	0	1	1	1	1	2	n/a	No	No	No
27	1	2	5	Fonctionnaire	3	4	1	900000	1	0	0	0	0	2	2	1	1	1	1	1	1	1	0	1	1	0	0	2	n/a	1	0	1	1	1	1	1	2	n/a	1	1	1	1	1	1	2	n/a	No	No	No
18	1	2	3	Sans_Emploi	3	7	1	900000	1	0	0	0	0	2	2	1	1	1	1	1	1	1	1	1	1	1	0	2	n/a	1	1	1	1	1	1	1	2	n/a	1	1	1	1	1	1	2	n/a	No	No	No
22	2	2	3	Sans_Emploi	2	7	1	900000	1	0	0	0	0	2	2	1	1	1	1	1	1	0	1	1	1	0	0	2	n/a	1	0	1	1	1	1	0	2	n/a	1	1	1	1	1	1	2	n/a	No	No	No
20	1	2	1	Profession_liberale	6	8	1	1200000	1	0	0	0	0	2	2	1	1	1	1	1	1	1	1	1	1	0	0	2	n/a	1	0	1	1	1	1	1	2	n/a	1	0	1	1	1	1	2	n/a	No	No	No
18	1	2	3	Sans_Emploi	6	6	1	1200000	1	0	0	0	0	2	2	1	1	1	1	1	1	0	0	0	1	0	0	2	n/a	1	0	1	1	1	1	1	2	n/a	1	1	1	1	1	1	2	n/a	Yes	No	No
30	1	2	3	Fonctionnaire	2	28	1	1500000	1	0	0	0	0	2	2	2	1	1	1	1	1	1	1	1	1	1	1	2	n/a	1	0	1	1	1	1	0	2	n/a	1	1	1	1	1	1	2	n/a	No	No	No
27	1	2	4	Sans_Emploi	4	8	1	1500000	1	0	0	0	0	2	2	1	1	1	1	1	1	0	0	1	1	0	0	2	n/a	1	1	1	1	1	1	1	2	n/a	1	1	1	1	1	1	2	n/a	No	No	No
23	1	2	4	Sans_Emploi	3	8	1	1500000	1	0	0	0	0	2	2	1	1	1	1	1	1	1	1	1	1	1	1	2	n/a	1	1	1	1	1	1	1	2	n/a	1	1	1	1	1	1	2	n/a	No	No	No
19	1	3	3	Sans_Emploi	4	36	2	0	1	0	0	0	0	2	2	1	1	1	1	1	1	1	1	1	1	1	1	2	n/a	1	1	1	1	1	1	1	2	n/a	1	1	1	1	1	1	2	n/a	Yes	No	No
24	2	2	4	Sans_Emploi	8	4	2	1500000	1	0	0	0	0	2	2	1	1	1	1	1	1	1	0	1	0	1	1	2	n/a	1	1	1	1	1	1	0	2	n/a	1	1	1	1	1	1	2	n/a	No	No	No
21	1	1	3	Sans_Emploi	2	5	1	900000	1	0	0	0	0	2	2	1	1	1	1	1	1	1	1	1	1	1	1	n/a	n/a	1	1	1	1	1	1	1	n/a	n/a	1	1	1	1	1	1	1	n/a	Yes	No	No
20	1	2	3	Profession_liberale	4	6	1	900000	2	1	1	0	0	2	2	1	1	0	0	0	0	0	1	1	1	0	0	2	n/a	0	0	1	1	0	0	0	2	n/a	0	1	1	1	1	1	2	n/a	No	No	No
24	1	2	3	Sans_Emploi	2	5	1	900000	2	1	1	0	0	2	2	1	1	1	1	1	0	0	1	1	1	0	0	2	n/a	1	0	1	1	1	0	0	2	n/a	0	0	1	1	1	1	2	n/a	No	No	No
18	1	1	1	Sans_Emploi	2	2	1	0	2	1	0	0	1	2	2	1	1	0	0	0	0	0	0	0	0	0	0	2	n/a	0	0	1	1	1	1	1	n/a	n/a	1	1	1	1	1	0	2	n/a	No	No	No
19	2	3	1	Menagere	9	28	2	150000	2	1	1	0	0	2	2	1	1	1	1	1	1	1	1	1	0	0	0	2	n/a	0	0	1	1	1	1	0	2	n/a	0	0	1	1	1	0	2	n/a	No	No	No
25	1	2	1	Sans_Emploi	11	32	1	15000000	2	2	2	0	0	2	2	1	1	1	1	1	1	1	1	1	1	1	1	2	n/a	1	0	1	1	1	1	0	2	n/a	0	1	1	1	1	1	2	n/a	No	No	No
18	2	3	1	Menagere	11	24	2	100000	2	1	1	0	0	2	2	1	1	1	1	1	1	1	1	0	0	0	0	2	n/a	1	0	1	1	1	1	0	2	n/a	0	1	1	1	1	0	2	n/a	No	No	No
20	1	2	1	Profession_liberale	3	5	1	1200000	2	0	0	0	0	2	2	1	1	0	0	0	0	0	0	0	0	0	0	2	n/a	0	0	0	1	1	1	1	n/a	n/a	1	1	1	1	1	1	1	n/a	No	No	No
22	1	2	2	Sans_Emploi	3	5	1	900000	2	1	1	0	0	2	2	1	1	1	1	1	0	0	0	1	1	0	0	2	n/a	1	0	1	1	0	1	0	2	n/a	1	0	1	1	1	1	2	n/a	Yes	No	No
20	1	2	3	Sans_Emploi	3	8	1	1200000	2	1	1	0	0	2	2	1	1	0	0	1	0	0	1	1	1	0	0	2	n/a	1	0	1	1	0	1	1	2	n/a	1	1	1	1	1	1	2	n/a	No	No	No
20	1	1	2	Profession_liberale	3	8	1	900000	2	1	1	0	0	2	1	1	1	0	0	0	0	0	0	0	0	0	0	n/a	n/a	1	1	1	1	1	1	1	n/a	n/a	1	1	1	1	1	1	1	n/a	No	No	No
20	1	1	2	Sans_Emploi	3	8	1	600000	2	1	1	0	0	2	2	1	1	1	1	1	1	1	1	1	1	1	1	1	n/a	1	1	1	1	1	1	1	1	n/a	1	1	1	1	1	1	n/a	n/a	No	No	No
20	2	3	3	Sans_Emploi	2	40	1	0	2	1	1	0	0	2	2	1	1	1	1	0	1	1	1	1	0	0	0	2	n/a	1	0	1	0	1	1	0	2	n/a	1	1	1	1	1	1	2	n/a	No	No	No
25	1	4	3	Sans_Emploi	12	24	1	0	2	1	1	0	0	2	2	1	1	1	1	1	1	1	1	1	1	1	1	2	n/a	1	1	1	1	1	1	1	2	n/a	1	1	1	1	1	1	2	n/a	No	No	No
22	1	2	4	Sans_Emploi	5	36	1	0	2	1	0	0	0	2	2	1	1	1	1	1	1	1	1	1	1	1	1	2	n/a	1	1	1	1	1	1	1	2	n/a	1	1	1	1	1	1	2	n/a	Yes	No	No
30	1	3	5	Sans_Emploi	5	40	1	0	2	1	1	0	0	2	2	1	1	1	1	1	1	1	1	1	0	0	0	2	n/a	1	0	1	1	1	1	0	2	n/a	1	1	1	1	1	0	2	n/a	No	No	No
18	2	3	1	Menagere	7	36	1	200000	2	1	1	0	0	2	2	1	1	1	1	1	1	1	1	1	0	0	0	2	n/a	1	1	1	0	0	0	0	2	n/a	1	1	1	1	1	0	2	n/a	No	No	No
27	1	3	1	Profession_liberale	8	36	1	200000	2	1	1	0	0	2	2	1	1	1	1	0	1	1	1	0	0	0	0	2	n/a	1	0	1	0	1	0	0	2	n/a	1	1	1	1	0	0	2	n/a	No	No	No
22	1	3	2	Profession_liberale	7	32	1	250000	2	1	1	0	0	2	2	1	1	1	1	1	1	1	1	1	1	0	0	2	n/a	1	0	1	1	1	1	1	2	n/a	1	1	1	1	1	1	2	n/a	Yes	No	No
25	1	3	4	Fonctionnaire	5	28	1	600000	2	1	1	0	0	2	2	1	1	1	1	1	1	1	1	1	1	1	1	2	n/a	1	1	1	1	1	1	1	2	n/a	1	1	1	1	1	1	2	n/a	No	No	No
27	1	2	3	Sans_Emploi	3	8	1	900000	2	1	1	0	0	2	2	1	1	1	1	1	1	0	0	1	0	0	0	2	n/a	1	1	1	1	1	1	1	2	n/a	1	1	1	1	1	1	2	n/a	No	No	No
22	1	1	4	Sans_Emploi	3	4	1	0	2	1	1	0	0	2	2	1	1	1	1	1	1	1	1	1	1	1	1	n/a	n/a	1	1	1	1	1	1	1	n/a	n/a	1	1	1	1	1	1	1	n/a	No	No	No
31	1	2	1	Sans_Emploi	3	6	1	900000	2	1	1	0	0	2	2	1	1	1	1	0	0	0	0	1	0	0	0	2	n/a	0	0	1	1	0	0	0	2	n/a	0	0	1	1	1	1	2	n/a	No	No	No
18	2	2	1	Profession_liberale	2	3	2	600000	2	1	0	0	0	2	2	1	1	1	1	1	1	0	0	1	1	0	0	2	n/a	0	0	1	1	1	0	1	2	n/a	0	0	1	1	1	1	2	n/a	Yes	No	No
18	1	2	1	Profession_liberale	15	28	1	6000000	2	2	1	0	0	2	2	1	1	0	1	0	0	0	0	0	0	1	1	2	n/a	1	1	1	1	0	0	1	2	n/a	0	1	1	1	1	1	2	n/a	No	No	No
27	1	3	1	Sans_Emploi	8	32	1	0	2	1	1	0	0	2	2	1	1	1	1	1	1	1	1	1	1	0	0	2	n/a	0	1	1	1	1	1	0	2	n/a	1	1	1	1	1	1	2	n/a	No	No	No
18	1	2	2	Sans_Emploi	4	6	1	900000	2	1	1	0	0	2	2	1	1	1	1	1	0	0	1	1	1	0	0	2	n/a	1	0	1	1	1	1	1	2	n/a	1	1	1	1	1	1	2	n/a	No	No	No
28	1	2	1	Profession_liberale	3	9	1	1200000	2	1	1	0	0	2	2	1	1	1	1	0	0	0	0	0	1	0	0	2	n/a	1	0	1	1	1	1	1	2	n/a	1	1	1	1	1	1	2	n/a	Yes	No	No
20	1	2	3	Sans_Emploi	8	4	1	1200000	2	1	1	0	0	2	2	1	1	0	1	1	0	1	1	1	1	0	0	2	n/a	1	0	1	1	1	1	1	2	n/a	1	1	1	1	1	1	2	n/a	No	No	No
28	1	2	3	Sans_Emploi	3	8	1	1200000	2	1	1	0	0	2	2	1	1	1	1	1	0	0	1	1	1	0	0	2	n/a	1	0	1	1	1	1	1	2	n/a	1	0	1	1	1	1	2	n/a	No	No	No
19	1	1	1	Profession_liberale	4	6	1	600000	2	1	1	0	0	2	2	1	1	0	0	0	0	0	0	0	0	0	0	n/a	n/a	1	1	1	1	1	1	0	n/a	n/a	1	1	1	1	1	0	2	n/a	Yes	No	No
23	2	3	4	Sans_Emploi	7	24	1	0	2	0	0	1	0	2	2	1	1	1	1	1	1	1	1	1	1	1	1	1	Vomissements	1	1	1	1	1	1	1	2	n/a	1	1	1	1	1	1	1	Port de gant	No	No	No
20	1	1	1	Profession_liberale	3	6	1	900000	2	1	1	0	0	2	2	1	1	1	1	1	1	1	1	1	1	1	1	1	n/a	1	1	1	1	1	1	1	n/a	n/a	1	1	1	1	1	1	n/a	n/a	No	No	No
22	1	1	3	Sans_Emploi	3	5	1	1200000	2	1	1	0	0	2	2	1	1	1	1	1	1	0	1	1	1	1	1	1	n/a	1	1	1	1	1	1	1	1	n/a	1	1	1	1	1	1	n/a	n/a	Yes	No	No
24	1	1	4	Sans_Emploi	3	2	1	1500000	2	1	1	0	0	2	2	1	1	1	1	1	1	1	1	1	1	1	1	1	n/a	1	1	1	1	1	1	1	n/a	n/a	1	1	1	1	1	1	1	n/a	No	No	No
25	1	4	4	Sans_Emploi	8	15	1	0	2	1	1	0	4	1	2	1	1	1	1	1	1	1	1	1	1	1	1	2	n/a	1	1	1	1	1	1	1	2	n/a	1	1	1	1	1	1	2	n/a	No	No	No
22	1	2	4	Sans_Emploi	8	36	1	0	2	0	0	1	0	2	2	1	1	1	1	1	1	1	1	1	1	1	1	2	n/a	1	1	1	1	1	1	1	2	n/a	1	1	1	1	1	1	2	n/a	No	No	No
26	1	2	4	Sans_Emploi	8	32	1	0	2	1	1	0	0	2	2	1	1	1	1	1	1	1	1	1	0	0	0	2	n/a	1	0	1	1	1	1	0	2	n/a	1	1	1	1	1	1	2	n/a	No	No	No
26	1	3	3	Sans_Emploi	7	24	1	0	2	0	0	1	0	2	2	1	1	1	1	1	1	1	1	1	1	1	1	2	n/a	1	1	1	1	1	1	1	2	n/a	1	1	1	1	1	1	2	n/a	No	No	No
20	1	3	4	Sans_Emploi	7	24	1	0	2	1	1	0	0	2	2	1	1	1	1	1	1	1	1	1	1	1	1	2	n/a	1	1	1	1	1	1	1	2	n/a	1	1	1	1	1	1	1	Se moucher dans un mouchoir	No	No	No
20	1	3	1	Sans_Emploi	3	32	1	0	2	1	1	0	0	2	2	1	1	1	1	1	1	1	1	1	1	1	1	2	n/a	1	1	1	1	1	1	1	2	n/a	1	1	1	1	1	1	2	n/a	No	No	No
25	1	3	4	Profession_liberale	6	32	1	500000	2	1	1	0	0	2	2	1	1	1	1	1	1	1	1	1	1	1	1	2	n/a	1	1	1	1	1	1	1	2	n/a	1	1	1	1	1	1	2	n/a	No	No	No
22	1	2	3	Sans_Emploi	2	7	1	900000	2	1	1	0	0	2	2	1	1	1	1	1	1	1	1	1	1	0	0	2	n/a	1	1	1	1	1	1	1	2	n/a	1	0	1	1	1	1	2	n/a	No	No	No
25	1	2	3	Sans_Emploi	2	7	1	900000	2	1	1	0	0	2	2	1	1	1	1	1	1	1	1	1	1	0	0	2	n/a	1	0	1	1	1	1	1	2	n/a	1	0	1	1	1	1	2	n/a	No	No	No
19	2	2	1	Menagere	10	36	2	150000	2	1	1	0	0	2	2	1	1	1	1	1	1	1	1	0	0	0	0	2	n/a	1	0	1	0	0	0	0	2	n/a	1	0	1	1	0	0	2	n/a	No	No	No
22	2	2	3	Profession_liberale	6	9	2	1200000	2	1	1	0	0	2	2	1	1	1	1	1	1	1	1	1	1	0	0	2	n/a	1	0	1	1	1	1	1	2	n/a	1	1	1	1	1	1	2	n/a	No	No	No
25	1	1	5	Sans_Emploi	4	4	1	900000	2	1	1	0	0	2	2	1	1	1	1	1	1	1	1	1	1	0	0	n/a	n/a	1	1	1	1	1	1	0	n/a	n/a	1	1	1	1	1	1	n/a	n/a	Yes	No	No
22	1	2	1	Sans_Emploi	3	6	1	900000	2	1	1	0	0	2	2	1	1	1	1	0	0	0	0	0	0	0	0	2	n/a	0	0	1	1	1	0	0	2	n/a	0	1	1	1	1	1	2	n/a	No	No	No
22	1	2	3	Sans_Emploi	4	5	1	900000	2	1	1	0	0	2	2	1	1	1	1	1	0	0	1	0	0	0	0	2	n/a	0	0	1	1	1	1	0	2	n/a	0	1	1	1	1	1	2	n/a	No	No	No
20	1	1	2	Profession_liberale	3	6	1	NA	2	1	1	0	0	2	2	1	1	0	0	0	0	0	0	0	0	0	0	2	n/a	0	0	0	0	0	0	0	2	n/a	0	0	0	1	0	0	2	n/a	No	No	No
27	1	1	1	Profession_liberale	3	7	1	900000	2	1	1	0	0	2	1	1	1	0	0	0	0	0	0	0	0	0	0	n/a	n/a	0	0	0	0	0	0	0	2	n/a	0	0	0	0	0	0	2	n/a	No	No	No
28	1	1	1	Profession_liberale	11	6	1	50000	2	1	1	0	0	2	2	1	1	1	1	0	0	0	0	0	0	0	0	2	n/a	1	1	1	1	1	1	0	n/a	n/a	0	1	1	1	1	1	n/a	n/a	No	No	No
23	1	2	1	Profession_liberale	3	5	1	900000	2	1	1	0	0	2	2	1	1	1	1	0	0	0	1	1	1	0	0	2	n/a	1	0	1	1	1	0	0	2	n/a	0	1	1	1	1	1	2	n/a	No	No	No
25	1	2	1	Profession_liberale	2	9	1	900000	2	1	1	0	0	2	2	1	1	1	1	0	0	0	1	1	1	0	0	2	n/a	1	0	1	1	1	0	0	2	n/a	0	1	1	1	1	1	2	n/a	No	No	No
24	1	2	1	Sans_Emploi	2	5	1	900000	2	0	0	1	0	2	2	1	1	1	0	0	0	0	0	0	1	0	0	2	n/a	1	0	1	1	1	1	1	2	n/a	0	1	1	1	1	1	2	n/a	No	No	No
22	1	2	3	Sans_Emploi	4	4	1	900000	2	1	1	0	0	2	2	1	1	0	1	0	0	0	0	1	0	0	0	2	n/a	1	0	1	1	1	1	1	2	n/a	0	1	1	1	1	1	2	n/a	No	No	No
22	1	2	3	Sans_Emploi	3	8	1	900000	2	1	1	0	0	2	2	1	1	0	1	0	0	0	0	1	0	0	0	2	n/a	1	0	1	1	0	0	0	2	n/a	0	0	1	1	1	1	2	n/a	No	No	No
20	1	2	1	Sans_Emploi	3	5	1	900000	2	1	1	0	0	2	2	1	1	0	0	0	0	0	0	0	0	0	0	2	n/a	1	0	1	0	0	0	0	2	n/a	0	0	1	1	0	0	2	n/a	No	No	No
20	1	2	1	Profession_liberale	3	7	1	1200000	2	1	1	0	0	2	2	1	1	0	1	0	0	0	0	0	1	0	0	2	n/a	1	0	1	1	0	0	0	2	n/a	0	0	1	1	1	0	2	n/a	No	No	No
18	2	2	1	Profession_liberale	10	8	2	900000	2	1	1	0	0	2	2	1	1	0	1	0	0	0	0	0	1	0	0	2	n/a	1	0	1	1	1	0	0	2	n/a	0	0	1	1	1	1	2	n/a	No	No	No
17	2	2	2	Sans_Emploi	10	9	2	1500000	2	1	1	0	0	2	2	1	1	0	0	0	0	0	1	1	1	0	0	2	n/a	1	0	1	1	1	1	1	2	n/a	0	0	1	1	1	1	2	n/a	No	No	No
28	1	2	1	Profession_liberale	3	7	1	NA	2	1	1	0	0	2	2	1	1	1	1	1	1	1	1	1	1	1	1	1	n/a	1	1	1	1	1	1	0	2	n/a	0	0	1	1	1	1	2	n/a	No	No	No
22	1	2	2	Profession_liberale	4	5	1	1200000	2	1	1	0	0	2	2	1	1	1	1	1	1	1	1	1	1	1	1	2	n/a	1	1	1	1	1	1	1	2	n/a	0	1	1	1	1	1	2	n/a	No	No	No
31	1	1	1	Profession_liberale	4	7	1	75000	2	1	1	0	0	2	1	1	1	0	1	1	1	1	1	1	1	1	1	n/a	n/a	1	0	1	1	1	1	0	n/a	n/a	0	0	1	1	1	1	n/a	n/a	No	No	No
25	1	1	1	Sans_Emploi	2	7	2	900000	2	1	0	0	1	2	2	1	1	1	1	0	1	0	0	1	0	0	0	n/a	n/a	1	0	0	0	0	0	0	2	n/a	0	0	1	1	1	1	n/a	n/a	No	No	No
22	1	1	1	Profession_liberale	4	7	1	900000	2	1	1	0	0	2	2	1	1	1	0	0	0	0	0	0	0	0	0	2	n/a	0	0	1	1	1	1	0	n/a	n/a	1	1	1	1	1	1	1	n/a	Yes	No	No
23	1	2	4	Sans_Emploi	4	5	1	900000	2	1	1	0	0	2	2	1	1	1	1	1	1	1	0	1	1	0	0	2	n/a	0	0	1	1	1	1	1	2	n/a	1	1	1	1	1	1	2	n/a	Yes	No	No
25	1	2	2	Sans_Emploi	4	8	1	900000	2	1	1	0	0	2	2	1	1	0	1	1	1	0	1	1	1	0	0	2	n/a	0	0	1	1	1	1	1	2	n/a	1	1	1	1	1	1	2	n/a	No	No	No
22	1	2	1	Sans_Emploi	3	8	1	900000	2	1	1	0	0	2	2	1	1	1	1	1	1	0	0	0	1	0	0	2	n/a	0	0	1	1	1	1	1	2	n/a	1	0	1	1	1	1	2	n/a	No	No	No
22	1	2	1	Profession_liberale	3	6	1	900000	2	1	1	0	0	2	2	1	1	1	1	1	0	0	1	1	1	0	0	2	n/a	1	0	1	1	1	1	1	2	n/a	1	1	1	1	1	1	2	n/a	No	No	No
22	1	2	1	Profession_liberale	4	5	1	900000	2	1	1	0	0	2	2	1	1	0	1	1	0	0	0	1	1	0	0	2	n/a	1	1	1	1	1	1	1	2	n/a	1	1	1	1	1	1	2	n/a	No	No	No
20	1	2	2	Profession_liberale	3	7	1	900000	2	1	1	0	0	2	2	1	1	0	1	0	0	0	0	0	1	0	0	2	n/a	1	0	1	1	1	1	0	2	n/a	1	0	1	1	1	1	2	n/a	No	No	No
22	1	2	1	Profession_liberale	3	6	1	900000	2	1	1	0	0	2	2	1	1	1	1	1	0	0	1	1	0	0	0	2	n/a	1	0	1	1	1	1	1	2	n/a	1	0	1	1	1	0	2	n/a	No	No	No
21	1	2	3	Profession_liberale	8	20	1	1500000	2	1	0	0	1	2	2	1	1	1	1	0	0	1	1	1	1	1	1	2	n/a	1	0	1	1	0	1	0	2	n/a	1	1	1	1	1	1	2	n/a	No	No	No
22	1	2	3	Sans_Emploi	4	4	1	1500000	2	1	1	0	0	2	2	1	1	1	1	1	0	0	0	1	1	0	0	2	n/a	1	0	1	1	1	1	0	2	n/a	1	0	1	1	1	1	2	n/a	No	No	No
26	1	1	3	Profession_liberale	2	9	1	100000	2	0	0	1	0	2	2	2	2	0	0	0	0	0	0	0	0	0	0	n/a	n/a	1	0	1	1	1	1	0	n/a	n/a	1	1	1	1	1	1	n/a	n/a	No	No	No
26	1	1	1	Profession_liberale	2	8	1	600000	2	1	1	0	0	2	1	1	1	1	1	1	0	1	1	1	1	0	0	n/a	n/a	1	0	1	1	1	1	0	n/a	n/a	1	1	1	1	1	1	n/a	n/a	Yes	No	No
28	1	1	1	Profession_liberale	3	3	1	600000	2	1	1	0	0	2	1	1	1	1	1	1	1	1	1	1	1	1	1	1	n/a	1	1	1	1	1	1	1	n/a	n/a	1	1	1	1	1	1	n/a	n/a	Yes	No	No
18	1	1	3	Sans_Emploi	2	8	1	900000	2	0	0	1	0	2	2	1	1	1	1	1	1	1	1	1	1	1	1	1	n/a	1	1	1	1	1	1	1	1	n/a	1	1	1	1	1	1	1	n/a	No	No	No
30	2	1	5	Fonctionnaire	7	6	1	900000	2	0	0	1	0	2	2	1	1	1	0	1	1	1	1	1	1	1	1	1	n/a	1	1	1	1	0	1	1	2	n/a	1	1	1	1	1	1	1	n/a	No	No	No
20	1	1	1	Profession_liberale	4	6	1	1200000	2	1	1	0	0	2	2	1	1	1	1	1	1	1	1	1	1	1	1	1	n/a	1	1	1	1	1	1	1	n/a	n/a	1	1	1	1	1	1	n/a	n/a	No	No	No
27	1	1	2	Profession_liberale	8	3	1	2250000	2	1	0	0	1	2	2	1	1	1	1	1	1	1	1	1	1	1	1	1	n/a	1	1	1	1	1	1	1	n/a	n/a	1	1	1	1	1	1	1	n/a	No	No	No
25	1	2	3	Employe_Prive	4	8	1	2400000	2	1	1	0	0	2	2	1	1	1	1	1	1	1	1	1	1	1	1	1	n/a	1	1	1	1	1	1	1	n/a	n/a	1	1	1	1	1	1	1	n/a	No	No	No
32	1	1	4	Employe_Prive	3	6	1	3000000	2	1	1	0	0	2	2	1	1	1	1	1	1	1	1	1	1	1	1	1	n/a	1	1	1	1	1	1	0	n/a	n/a	1	1	1	1	1	1	1	n/a	No	No	No
21	1	2	3	Sans_Emploi	3	8	1	0	2	0	0	0	0	2	2	1	1	1	1	1	1	1	1	1	1	1	1	1	n/a	1	1	1	1	1	1	1	n/a	n/a	1	0	1	1	1	1	n/a	n/a	No	No	No
26	1	1	4	Employe_Prive	5	8	1	0	2	1	1	0	0	2	2	1	1	1	1	1	1	1	1	1	1	1	1	1	n/a	1	1	1	1	1	1	1	n/a	n/a	1	1	1	1	1	1	1	n/a	No	No	No
23	1	1	3	Profession_liberale	3	8	1	0	2	0	0	1	0	2	2	1	1	1	1	1	1	1	1	1	1	1	1	1	n/a	1	1	1	1	1	1	1	2	n/a	1	1	1	1	1	1	n/a	n/a	No	No	No
23	1	1	1	Profession_liberale	3	9	2	NA	2	1	1	0	0	2	2	1	1	1	1	1	1	1	1	1	1	1	1	1	n/a	1	1	1	1	1	1	1	n/a	n/a	1	1	0	0	0	1	n/a	n/a	No	No	No
22	1	3	4	Sans_Emploi	7	28	1	0	2	1	1	0	0	2	2	1	1	1	1	1	1	1	1	1	1	1	1	2	n/a	1	1	1	1	1	1	1	2	n/a	1	1	1	1	1	1	2	n/a	No	No	No
20	1	3	3	Sans_Emploi	8	32	1	0	2	1	0	1	0	2	2	1	1	1	1	1	1	1	1	1	1	1	1	2	n/a	1	1	1	1	1	1	1	2	n/a	1	1	1	1	1	1	2	n/a	No	No	No
32	1	3	4	Sans_Emploi	3	36	1	0	2	1	1	0	0	2	2	1	1	1	1	1	1	1	1	1	1	1	1	2	n/a	1	1	1	1	1	1	1	2	n/a	1	1	1	1	1	1	2	n/a	No	No	No
27	1	3	4	Sans_Emploi	3	4	1	0	2	1	1	0	0	2	2	1	1	1	1	1	1	1	1	1	1	1	1	2	n/a	1	1	1	1	1	1	1	2	n/a	1	1	1	1	1	1	2	n/a	No	No	No
24	2	3	5	Fonctionnaire	7	32	1	300000	2	0	0	1	0	2	2	1	1	1	1	1	1	1	1	1	1	1	1	2	n/a	1	1	1	1	1	1	1	2	n/a	1	1	1	1	1	1	2	n/a	No	No	No
22	1	3	4	Employe_Prive	7	17	1	500000	2	1	1	0	0	2	2	1	1	1	1	1	1	1	1	1	1	1	1	2	n/a	1	1	1	1	1	1	1	2	n/a	1	1	1	1	1	1	2	n/a	No	No	No
30	1	2	4	Profession_liberale	3	5	1	900000	2	1	1	0	0	2	2	1	1	1	1	1	1	1	1	1	1	1	1	2	n/a	1	1	1	1	1	1	1	2	n/a	1	1	1	1	1	1	2	n/a	No	No	No
21	1	2	3	Profession_liberale	2	9	1	900000	2	1	1	0	0	2	2	1	1	1	1	1	1	0	1	1	0	0	0	2	n/a	1	0	1	1	1	1	0	2	n/a	1	0	1	1	1	1	2	n/a	No	No	No
22	1	2	2	Profession_liberale	3	8	1	900000	2	1	1	0	0	2	2	1	1	1	1	1	1	1	1	1	1	0	0	2	n/a	1	0	1	1	1	1	1	2	n/a	1	0	1	1	1	1	2	n/a	Yes	No	No
24	1	2	1	Profession_liberale	3	8	1	900000	2	1	1	0	0	2	2	1	1	1	1	1	1	1	1	1	1	0	0	2	n/a	1	0	1	1	1	1	1	2	n/a	1	0	1	1	1	1	2	n/a	No	No	No
27	1	2	1	Profession_liberale	4	6	1	900000	2	1	1	0	0	2	2	1	1	1	1	1	1	0	1	1	1	0	0	2	n/a	1	0	1	1	1	1	1	2	n/a	1	1	1	1	1	1	2	n/a	No	No	No
24	1	2	4	Fonctionnaire	3	5	1	900000	2	1	1	0	0	2	2	1	1	1	1	1	1	1	1	1	1	1	1	2	n/a	1	0	1	1	1	1	0	2	n/a	1	1	1	1	1	1	2	n/a	No	No	No
29	1	2	1	Profession_liberale	3	6	1	900000	2	1	1	0	0	2	2	1	1	0	1	1	1	0	0	0	1	0	0	2	n/a	1	0	1	1	1	1	0	2	n/a	1	0	1	1	1	1	2	n/a	No	No	No
29	1	2	3	Profession_liberale	3	6	1	900000	2	1	1	0	0	2	2	1	1	1	1	1	1	1	1	1	1	1	0	2	n/a	1	0	1	1	1	1	1	2	n/a	1	1	1	1	1	1	2	n/a	No	No	No
22	1	2	4	Sans_Emploi	3	5	1	900000	2	1	1	0	0	2	2	1	1	1	1	1	1	1	0	1	1	1	0	2	n/a	1	0	1	1	1	1	0	2	n/a	1	1	1	1	1	1	2	n/a	No	No	No
26	1	2	1	Sans_Emploi	3	6	1	900000	2	1	1	0	0	2	2	1	1	1	1	1	1	0	1	1	1	0	0	2	n/a	1	0	1	1	1	1	1	2	n/a	1	0	1	1	1	1	2	n/a	No	No	No
27	1	2	2	Sans_Emploi	4	5	1	900000	2	1	1	0	0	2	2	1	1	1	1	1	1	1	1	1	1	1	1	2	n/a	1	0	1	1	1	1	1	2	n/a	1	1	1	1	1	1	2	n/a	Yes	No	No
28	1	2	3	Sans_Emploi	4	6	1	900000	2	1	1	0	0	2	2	1	1	1	1	1	1	0	1	1	1	0	0	2	n/a	1	0	1	1	1	1	1	2	n/a	1	1	1	1	1	1	2	n/a	No	No	No
24	1	2	3	Sans_Emploi	3	5	1	900000	2	1	1	0	0	2	2	1	1	1	1	1	1	0	1	1	0	1	1	2	n/a	1	0	1	1	1	1	1	2	n/a	1	1	1	1	1	1	2	n/a	Yes	No	No
22	1	2	2	Profession_liberale	4	6	1	1200000	2	1	1	0	0	2	2	1	1	1	1	1	1	1	1	1	1	1	1	2	n/a	1	0	1	1	1	1	0	2	n/a	1	1	1	1	1	1	2	n/a	No	No	No
18	1	2	2	Profession_liberale	6	8	1	1200000	2	0	0	1	0	2	2	1	1	1	1	1	1	1	1	1	1	0	0	2	n/a	1	1	1	1	1	1	1	2	n/a	1	1	1	1	1	1	2	n/a	No	No	No
24	1	2	1	Profession_liberale	3	4	1	1200000	2	1	1	0	0	2	2	1	1	1	1	1	1	1	1	1	1	0	0	2	n/a	1	0	1	1	1	1	1	2	n/a	1	1	1	1	1	1	2	n/a	No	No	No
28	1	2	4	Sans_Emploi	3	7	1	1200000	2	1	1	0	0	2	2	1	1	1	1	1	1	1	1	1	1	1	1	2	n/a	1	1	1	1	1	1	1	2	n/a	1	1	1	1	1	1	2	n/a	No	No	No
30	1	2	4	Sans_Emploi	3	6	1	1200000	2	1	1	0	0	2	2	1	1	1	1	1	1	0	1	1	1	1	1	2	n/a	1	1	1	1	1	1	1	2	n/a	1	1	1	1	1	1	2	n/a	No	No	No
20	1	2	3	Sans_Emploi	4	6	1	1200000	2	1	1	0	0	2	2	1	1	1	1	1	1	1	1	1	1	0	0	2	n/a	1	1	1	1	1	1	1	2	n/a	1	1	1	1	1	1	2	n/a	Yes	No	No
28	1	2	4	Sans_Emploi	3	8	1	1200000	2	1	1	0	0	2	2	1	1	1	1	1	1	1	0	1	1	1	1	2	n/a	1	0	1	1	1	1	1	2	n/a	1	1	1	1	1	1	2	n/a	No	No	No
28	1	2	4	Sans_Emploi	3	7	1	1200000	2	0	0	1	0	2	2	1	1	0	1	1	1	0	1	1	1	1	1	2	n/a	1	1	1	1	0	1	1	2	n/a	1	1	1	1	1	1	2	n/a	No	No	No
20	1	2	3	Sans_Emploi	4	5	1	1200000	2	1	1	0	0	2	2	1	1	0	1	1	1	1	1	1	1	0	0	2	n/a	1	0	1	1	1	1	1	2	n/a	1	0	1	1	1	1	2	n/a	No	No	No
28	1	2	4	Sans_Emploi	4	4	1	1200000	2	1	1	0	0	2	2	1	1	1	1	1	1	1	1	1	1	0	0	2	n/a	1	0	1	1	1	1	1	2	n/a	1	1	1	1	1	1	2	n/a	No	No	No
24	1	2	3	Sans_Emploi	4	7	1	1200000	2	1	1	0	0	2	2	1	1	1	1	1	1	1	1	1	1	0	0	2	n/a	1	1	1	1	0	1	1	2	n/a	1	1	1	1	1	1	2	n/a	No	No	No
32	1	2	3	Sans_Emploi	2	8	1	1200000	2	1	1	0	0	2	2	1	1	1	1	1	1	1	1	1	1	0	0	2	n/a	1	0	1	1	1	1	1	2	n/a	1	1	1	1	1	1	2	n/a	Yes	No	No
24	1	2	3	Profession_liberale	10	7	1	1500000	2	1	1	0	0	2	2	1	1	1	1	1	1	1	1	1	1	0	0	2	n/a	1	0	1	1	1	1	1	2	n/a	1	1	1	1	1	1	2	n/a	No	No	No
21	1	2	1	Profession_liberale	4	4	1	1500000	2	1	1	0	0	2	2	1	1	1	1	1	1	0	1	1	1	0	0	2	n/a	1	0	1	1	1	1	1	2	n/a	1	1	1	1	1	1	2	n/a	No	No	No
20	1	2	1	Sans_Emploi	6	4	1	1500000	2	1	1	0	0	2	2	1	1	1	1	1	1	1	1	0	1	0	0	2	n/a	1	0	1	1	1	1	1	2	n/a	1	0	1	1	1	1	2	n/a	No	No	No
29	1	2	4	Profession_liberale	5	5	1	1800000	2	1	1	0	0	2	2	1	1	1	1	1	1	1	1	1	1	0	0	2	n/a	1	1	1	1	1	1	1	2	n/a	1	1	1	1	1	1	2	n/a	No	No	No
24	1	1	3	Sans_Emploi	7	2	1	600000	2	0	0	1	0	2	2	1	1	1	1	1	1	1	1	1	1	1	1	n/a	n/a	1	1	1	1	1	1	1	n/a	n/a	1	1	1	1	1	1	n/a	n/a	Yes	No	No
25	1	1	3	Sans_Emploi	4	3	1	600000	2	1	1	0	0	2	2	1	1	1	1	1	1	1	1	1	1	1	1	n/a	n/a	1	1	1	1	1	1	1	n/a	n/a	1	1	1	1	1	1	n/a	n/a	No	No	No
23	1	1	4	Sans_Emploi	3	1	1	900000	2	1	1	0	0	2	2	1	1	1	1	1	1	1	1	1	1	1	1	n/a	n/a	1	1	1	1	1	1	1	n/a	n/a	1	1	1	1	1	1	n/a	n/a	No	No	No
26	1	1	5	Sans_Emploi	3	6	1	900000	2	1	1	0	0	2	2	1	1	1	1	1	1	1	1	1	1	1	1	n/a	n/a	1	1	1	1	1	1	1	n/a	n/a	1	1	1	1	1	1	n/a	n/a	Yes	No	No
20	1	1	3	Sans_Emploi	6	2	1	1050000	2	1	0	0	1	2	2	1	1	1	1	1	1	1	1	1	1	1	0	n/a	n/a	1	0	1	1	1	1	0	n/a	n/a	1	1	1	1	1	1	n/a	n/a	Yes	No	No
23	1	1	3	Sans_Emploi	12	8	1	1200000	2	1	1	0	0	2	2	1	1	1	1	1	1	1	1	1	1	1	1	n/a	n/a	1	1	1	1	1	1	1	n/a	n/a	1	1	1	1	1	1	n/a	n/a	No	No	No
17	1	2	3	Sans_Emploi	8	7	1	1200000	2	1	1	0	0	2	2	1	1	1	1	1	1	1	1	1	1	1	1	n/a	n/a	1	1	1	1	1	1	1	n/a	n/a	1	0	0	1	1	1	1	n/a	No	No	No
20	1	1	1	Profession_liberale	3	5	1	1500000	2	1	1	0	0	2	2	1	1	1	1	1	1	1	1	1	1	1	1	n/a	n/a	1	1	1	1	1	1	0	1	n/a	1	1	1	1	1	1	1	n/a	No	No	No
21	1	1	2	Profession_liberale	3	2	1	NA	2	1	1	0	0	2	2	1	1	1	1	1	1	1	1	1	1	1	1	n/a	n/a	1	1	1	1	1	1	1	n/a	n/a	1	1	1	1	1	1	n/a	n/a	Yes	No	No
22	1	1	4	Sans_Emploi	5	7	1	0	2	1	1	0	0	2	2	1	1	1	1	1	1	1	1	1	1	1	1	n/a	n/a	1	1	1	1	1	1	1	n/a	n/a	1	0	1	1	1	1	1	n/a	No	No	No
25	1	1	1	Profession_liberale	9	8	1	0	2	1	1	0	0	2	2	1	1	1	1	1	1	1	1	1	1	1	1	n/a	n/a	1	1	1	1	1	1	1	n/a	n/a	1	1	1	1	1	1	1	n/a	No	No	No
25	1	1	1	Profession_liberale	3	3	1	900000	2	1	1	0	0	2	2	1	1	0	0	0	0	0	0	0	0	0	0	2	n/a	0	0	0	0	0	0	0	n/a	n/a	0	1	1	1	1	1	n/a	n/a	Yes	No	No
30	1	2	1	Profession_liberale	3	6	1	900000	2	1	1	0	0	2	2	1	1	1	1	0	1	0	1	1	0	0	0	2	n/a	1	0	1	1	0	1	0	2	n/a	0	1	1	1	1	1	2	n/a	Yes	No	No
27	1	2	2	Sans_Emploi	3	5	1	900000	2	1	1	0	0	2	2	1	1	1	1	1	1	1	0	1	1	0	0	2	n/a	1	0	1	1	1	1	1	2	n/a	0	1	1	1	1	1	2	n/a	No	No	No
39	1	2	1	Profession_liberale	10	6	1	1000000	2	1	1	0	0	2	2	1	1	0	0	0	1	1	1	1	1	1	1	2	n/a	1	0	1	1	1	1	1	2	n/a	0	1	1	1	1	1	2	n/a	Yes	No	No
25	1	2	1	Profession_liberale	5	9	1	1200000	2	1	1	0	0	2	2	1	1	1	1	1	0	0	1	1	1	0	0	2	n/a	1	0	1	1	1	1	1	2	n/a	1	1	1	1	1	1	2	n/a	No	No	No
21	1	1	5	Sans_Emploi	3	1	1	600000	2	1	1	0	0	2	2	1	1	1	1	1	1	1	1	1	1	1	1	1	n/a	1	0	1	1	1	1	1	n/a	n/a	1	1	1	1	1	1	n/a	n/a	Yes	No	No
28	1	1	4	Sans_Emploi	7	5	1	750000	2	1	1	0	0	2	2	1	1	1	1	1	1	1	1	1	1	1	1	1	n/a	1	1	1	1	1	1	1	n/a	n/a	1	1	1	1	1	1	n/a	n/a	No	No	No
23	1	1	3	Sans_Emploi	3	5	1	900000	2	1	1	0	0	2	2	1	1	1	1	1	1	1	1	1	1	1	1	1	n/a	1	1	1	1	1	1	1	2	n/a	1	1	1	1	1	1	n/a	n/a	No	No	No
23	1	1	3	Profession_liberale	7	8	1	1800000	2	1	1	0	0	2	2	1	1	1	1	1	1	1	1	1	1	1	1	1	n/a	1	1	1	1	1	1	1	n/a	n/a	1	1	1	1	1	1	n/a	n/a	Yes	No	No
25	1	1	3	Sans_Emploi	10	4	1	2400000	2	1	1	0	0	2	2	1	1	1	1	1	1	1	1	1	1	1	1	1	n/a	1	1	0	1	1	1	1	n/a	n/a	1	1	1	1	1	1	n/a	n/a	No	No	No
21	1	1	2	Profession_liberale	3	9	1	NA	2	1	1	0	0	2	2	1	1	1	1	1	1	1	1	1	1	1	1	1	n/a	1	1	1	1	1	1	1	n/a	n/a	1	1	1	1	1	1	1	n/a	No	No	No
27	1	2	4	Profession_liberale	4	8	1	0	2	1	1	0	0	2	2	1	1	1	1	1	1	1	1	1	1	1	1	1	n/a	1	1	1	1	1	1	1	1	n/a	1	1	1	1	1	1	n/a	n/a	No	No	No
27	1	1	2	Sans_Emploi	8	1	1	0	2	1	1	0	0	2	2	1	1	1	1	1	1	1	1	1	1	1	1	1	n/a	1	1	1	1	1	1	1	n/a	n/a	1	1	1	1	1	1	n/a	n/a	No	No	No
23	1	2	3	Sans_Emploi	8	24	1	0	2	1	1	0	0	2	2	1	1	1	1	1	1	1	1	1	1	1	1	2	n/a	1	1	1	1	1	1	1	2	n/a	1	1	1	1	1	1	1	Se moucher dans un kleenex	No	No	No
26	1	3	3	Sans_Emploi	10	36	1	0	2	1	1	0	0	2	2	1	1	1	1	1	1	1	1	1	1	1	1	2	n/a	1	1	1	1	1	1	1	2	n/a	1	1	1	1	1	1	2	n/a	No	No	No
33	1	3	4	Profession_liberale	7	21	1	650000	2	1	1	0	0	2	2	1	1	1	1	1	1	1	1	1	1	1	1	2	n/a	1	1	1	1	1	1	1	2	n/a	1	1	1	1	1	1	2	n/a	Yes	No	No
23	1	2	1	Profession_liberale	3	7	1	900000	2	1	1	0	0	2	2	1	1	1	1	1	1	1	1	1	0	0	0	2	n/a	1	0	1	1	1	1	1	2	n/a	1	0	1	1	1	1	2	n/a	Yes	No	No
23	1	2	2	Profession_liberale	3	4	1	900000	2	1	1	0	0	2	2	1	1	1	1	1	1	0	1	1	1	0	0	2	n/a	1	0	1	1	0	1	1	2	n/a	1	0	1	1	1	1	2	n/a	No	No	No
30	1	2	4	Profession_liberale	3	6	1	1500000	2	1	1	0	0	2	2	1	1	1	1	1	1	1	1	1	1	1	1	2	n/a	1	1	1	1	1	1	1	2	n/a	1	1	1	1	1	1	2	n/a	No	No	No
30	1	2	4	Employe_Prive	3	7	1	1500000	2	1	1	0	0	2	2	1	1	1	1	1	1	0	1	1	1	1	1	2	n/a	1	1	1	1	1	1	1	2	n/a	1	1	1	1	1	1	2	n/a	No	No	No
26	1	2	4	Sans_Emploi	3	7	1	1500000	2	1	1	0	0	2	2	1	1	1	1	1	1	1	1	1	1	1	1	2	n/a	1	1	1	1	1	1	1	2	n/a	1	1	1	1	1	1	2	n/a	No	No	No
27	1	2	4	Profession_liberale	3	8	1	1800000	2	1	1	0	0	2	2	1	1	1	1	1	1	0	0	1	1	0	0	2	n/a	1	0	1	1	1	1	1	2	n/a	1	1	1	1	1	1	2	n/a	No	No	No
27	1	1	3	Sans_Emploi	7	2	1	750000	2	1	1	0	0	2	2	1	1	1	1	1	1	1	1	1	1	1	1	n/a	n/a	1	1	1	1	1	1	1	n/a	n/a	1	1	1	1	1	1	1	n/a	No	No	No
23	1	1	2	Profession_liberale	4	7	1	900000	2	1	1	0	0	2	2	1	1	1	1	1	1	1	1	1	1	1	1	n/a	n/a	1	1	1	1	1	1	1	1	n/a	1	1	1	1	1	1	n/a	n/a	No	No	No
27	1	1	3	Profession_liberale	3	5	1	1050000	2	1	1	0	0	2	2	1	1	1	1	1	1	1	1	1	1	1	1	n/a	n/a	1	1	1	1	1	1	1	n/a	n/a	1	1	1	1	1	1	n/a	n/a	Yes	No	No
35	1	1	4	Sans_Emploi	3	8	1	1500000	2	1	1	0	0	2	2	1	1	1	1	1	1	1	1	1	1	1	1	n/a	n/a	1	0	1	1	1	1	0	n/a	n/a	1	1	1	1	0	0	n/a	n/a	Yes	No	No
23	1	1	5	Employe_Prive	6	4	1	2400000	2	1	1	0	0	2	1	1	1	1	1	1	1	1	1	1	1	1	1	n/a	n/a	1	1	1	1	1	1	1	n/a	n/a	1	1	1	1	1	1	1	n/a	No	No	No
23	1	1	3	Profession_liberale	3	5	1	0	3	2	2	0	0	2	2	1	1	0	0	0	0	0	0	0	0	0	0	2	n/a	0	0	0	0	0	0	0	n/a	n/a	0	0	0	0	0	0	2	n/a	No	No	No
25	1	2	2	Sans_Emploi	7	28	1	0	3	2	2	0	0	2	2	1	1	1	1	1	1	1	1	1	1	0	0	2	n/a	1	0	1	0	0	1	0	2	n/a	0	1	1	1	1	0	2	n/a	No	No	No
22	1	3	3	Profession_liberale	5	20	1	300000	3	2	2	0	0	2	2	1	1	1	1	1	1	1	1	1	1	1	1	2	n/a	1	1	1	1	1	1	1	2	n/a	1	1	1	1	1	1	2	n/a	No	No	No
33	1	3	1	Sans_Emploi	13	28	1	0	3	2	2	0	0	2	2	1	1	1	1	1	1	1	1	0	0	0	0	2	n/a	0	0	1	0	0	0	0	2	n/a	0	0	1	1	0	0	2	n/a	No	No	No
25	1	2	1	Sans_Emploi	10	8	1	1500000	3	2	2	0	0	2	2	1	1	1	1	1	0	1	0	1	1	0	0	2	n/a	1	0	1	1	1	1	1	2	n/a	1	1	1	1	1	1	2	n/a	Yes	No	No
30	1	1	4	Sans_Emploi	4	4	1	0	3	2	2	0	0	2	2	1	1	1	1	1	1	1	1	1	1	1	1	1	n/a	1	1	1	1	1	1	1	n/a	n/a	1	1	1	1	1	1	1	n/a	No	No	No
25	1	3	1	Sans_Emploi	8	32	1	0	3	2	2	0	0	2	2	1	1	1	1	1	1	1	1	1	1	1	1	2	n/a	1	1	1	1	1	1	1	2	n/a	1	1	1	1	1	1	2	n/a	No	No	No
21	1	3	1	Profession_liberale	3	32	1	200000	3	2	2	0	0	2	2	1	1	1	1	1	1	1	1	1	0	0	0	2	n/a	1	0	1	0	0	0	1	2	n/a	1	0	1	1	1	0	2	n/a	No	No	No
30	1	3	2	Profession_liberale	14	36	1	250000	3	2	2	0	0	2	2	1	1	1	1	1	1	1	1	1	1	0	0	2	n/a	1	1	1	1	1	1	0	2	n/a	1	1	1	1	1	1	2	n/a	No	No	No
25	1	3	1	Profession_liberale	12	19	1	300000	3	2	2	0	0	2	2	1	1	1	1	1	1	1	1	1	1	0	0	2	n/a	1	0	1	1	1	1	1	2	n/a	1	1	1	1	1	1	2	n/a	No	No	No
29	1	3	3	Profession_liberale	4	19	1	300000	3	2	2	0	0	2	2	1	1	1	1	1	1	1	1	1	1	0	0	2	n/a	1	1	1	1	1	1	1	2	n/a	1	1	1	1	1	1	2	n/a	No	No	No
30	1	3	5	Fonctionnaire	5	36	1	600000	3	2	2	0	0	2	2	1	1	1	1	1	1	1	1	1	1	1	0	2	n/a	1	0	1	1	1	1	1	2	n/a	1	1	1	1	1	1	2	n/a	No	No	No
29	1	2	4	Sans_Emploi	4	4	1	750000	3	3	3	0	0	2	2	1	1	1	1	1	1	1	1	1	1	1	1	2	n/a	1	0	1	1	1	1	0	2	n/a	1	1	1	1	1	1	2	n/a	Yes	No	No
32	1	2	4	Employe_Prive	5	21	1	1000000	3	2	2	0	0	2	2	1	1	1	1	1	1	1	1	1	1	1	1	2	n/a	1	1	1	1	1	1	1	2	n/a	1	1	1	1	1	1	2	n/a	No	No	No
27	1	2	4	Fonctionnaire	2	4	1	1200000	3	2	0	0	2	2	2	1	1	1	1	1	1	1	1	1	1	1	1	2	n/a	1	1	1	1	1	1	1	2	n/a	1	1	1	1	1	1	2	n/a	No	No	No
28	1	2	1	Sans_Emploi	4	8	1	1200000	3	2	2	0	0	2	2	1	1	0	1	1	1	0	0	0	0	0	0	2	n/a	1	0	1	1	1	1	0	2	n/a	1	0	1	1	1	1	2	n/a	No	No	No
23	1	2	1	Profession_liberale	3	7	1	900000	3	2	1	0	1	2	2	1	1	1	0	0	0	0	0	1	0	0	0	2	n/a	1	0	1	1	0	0	0	2	n/a	0	0	1	1	1	1	2	n/a	No	No	No
26	1	2	1	Profession_liberale	4	5	1	900000	3	2	2	0	0	2	2	1	1	1	1	1	0	0	0	1	0	0	0	2	n/a	1	0	1	1	1	1	1	2	n/a	0	0	1	1	1	1	2	n/a	No	No	No
26	1	2	3	Profession_liberale	5	5	1	1200000	3	2	2	0	0	2	2	1	1	1	1	1	1	1	1	1	1	0	0	2	n/a	0	0	1	1	1	1	0	2	n/a	1	1	1	1	1	1	2	n/a	No	No	No
28	1	2	4	Sans_Emploi	4	8	1	1200000	3	2	2	0	0	2	2	1	1	1	1	1	1	0	0	1	0	0	0	2	n/a	0	0	0	0	0	1	0	2	n/a	1	1	1	1	1	1	2	n/a	No	No	No
28	1	2	2	Sans_Emploi	5	7	1	1500000	3	2	2	0	0	2	2	1	1	1	1	1	0	0	1	1	1	0	0	2	n/a	1	0	1	1	0	1	0	2	n/a	1	0	1	1	1	1	n/a	n/a	Yes	No	No
21	1	1	3	Sans_Emploi	9	28	1	0	3	1	1	1	0	2	2	1	1	1	1	1	1	1	1	1	1	1	1	1	Vomissements diarrhée	1	1	1	1	1	1	1	2	n/a	1	1	1	1	1	1	2	n/a	Yes	No	No
25	1	3	4	Sans_Emploi	5	24	1	0	3	2	2	0	0	2	2	1	1	1	1	1	1	1	1	1	1	1	1	2	n/a	1	1	1	1	1	1	1	2	n/a	1	1	1	1	1	1	2	n/a	No	No	No
25	1	3	3	Sans_Emploi	12	36	1	0	3	2	0	0	0	2	2	1	1	1	1	1	1	1	1	1	1	1	1	2	n/a	1	1	1	1	1	1	0	2	n/a	1	1	1	1	1	1	2	n/a	No	No	No
16	1	3	1	Sans_Emploi	8	28	1	0	3	1	1	1	0	2	2	1	1	1	1	1	1	1	1	1	1	0	0	2	n/a	1	1	1	1	1	1	0	2	n/a	1	0	1	1	1	0	2	n/a	Yes	No	No
29	1	3	3	Sans_Emploi	6	28	1	0	3	2	2	0	0	2	2	1	1	1	1	1	1	1	1	1	1	1	1	2	n/a	1	1	1	1	1	1	1	2	n/a	1	1	1	1	1	1	2	n/a	No	No	No
30	2	3	2	Menagere	11	36	1	250000	3	2	3	0	0	1	2	1	1	1	1	1	1	1	1	1	1	0	0	2	n/a	1	1	1	1	1	0	0	2	n/a	1	1	1	1	1	1	2	n/a	No	No	No
32	1	3	4	Profession_liberale	5	26	1	500000	3	2	2	0	0	2	2	1	1	1	1	1	1	1	1	1	1	1	1	2	n/a	1	1	1	1	1	1	1	2	n/a	1	1	1	1	1	1	2	n/a	No	No	No
30	1	3	4	Employe_Prive	4	36	1	600000	3	2	2	0	0	2	2	1	1	1	1	1	1	1	1	1	1	1	1	2	n/a	1	1	1	1	1	1	1	2	n/a	1	1	1	1	1	1	2	n/a	No	No	No
35	1	3	4	Employe_Prive	5	19	1	1000000	3	2	2	0	0	2	2	1	1	1	1	1	1	1	1	1	1	0	0	2	n/a	1	1	1	1	1	1	1	2	n/a	1	1	1	1	1	1	2	n/a	No	No	No
27	1	2	2	Sans_Emploi	4	7	1	1500000	3	2	2	0	0	2	2	1	1	1	1	1	1	0	1	1	1	0	0	2	n/a	1	0	1	1	1	1	1	2	n/a	1	1	1	1	1	1	2	n/a	Yes	No	No
27	3	3	2	Profession_liberale	7	22	2	400000	3	2	2	0	0	2	2	1	1	1	1	1	1	1	1	1	1	0	0	2	n/a	1	1	1	1	1	0	0	2	n/a	1	1	1	1	1	1	1	Toussez dans un mouchoir	No	No	No
36	3	2	3	Profession_liberale	3	32	2	500000	3	2	2	0	0	2	2	1	1	1	1	1	1	1	1	1	1	0	0	2	n/a	1	0	1	1	1	1	0	2	n/a	1	1	1	1	1	1	2	n/a	No	No	No
34	1	1	4	Employe_Prive	3	7	1	1050000	3	2	2	0	0	2	2	1	1	1	1	1	1	1	1	1	1	1	1	n/a	n/a	1	1	1	1	1	1	1	n/a	n/a	1	1	1	1	1	1	1	n/a	No	No	No
30	1	2	1	Sans_Emploi	4	9	1	1200000	3	2	2	0	0	2	2	1	1	0	1	0	0	0	0	0	1	0	0	2	n/a	0	0	1	1	0	0	0	2	n/a	0	0	1	1	0	0	2	n/a	No	No	No
22	1	1	1	Profession_liberale	4	5	1	NA	3	2	2	0	0	2	2	1	1	0	0	0	0	0	0	0	0	0	0	2	n/a	0	0	0	0	0	0	0	n/a	n/a	0	0	0	0	0	0	2	n/a	Yes	Yes	Yes
22	2	2	1	Profession_liberale	10	4	1	1500000	3	2	2	0	0	2	2	1	1	1	1	1	1	1	1	1	1	0	0	2	n/a	0	0	1	1	0	0	1	2	n/a	0	0	1	1	1	1	2	n/a	No	No	No
27	1	1	3	Profession_liberale	4	6	1	900000	3	2	2	0	0	2	2	1	1	0	0	0	0	1	1	1	0	0	0	2	n/a	1	0	1	1	1	1	0	n/a	n/a	0	0	1	1	1	1	n/a	n/a	Yes	No	No
27	1	2	2	Profession_liberale	10	6	1	1000000	3	2	2	0	0	2	2	1	1	1	1	0	0	0	0	0	0	0	0	2	n/a	1	0	1	1	1	1	1	2	n/a	0	1	1	1	1	1	2	n/a	No	No	No
27	1	2	1	Profession_liberale	6	7	1	1500000	3	2	2	0	0	2	2	1	1	1	1	0	0	0	0	0	1	0	0	2	n/a	1	0	0	1	0	0	0	2	n/a	0	0	1	1	1	1	2	n/a	No	No	No
35	1	2	1	Profession_liberale	3	4	1	900000	3	1	1	1	0	2	2	1	1	1	1	0	1	1	1	0	1	0	0	2	n/a	1	0	1	1	1	1	1	2	n/a	0	1	1	1	1	1	2	n/a	Yes	No	No
23	1	2	3	Sans_Emploi	3	6	1	900000	3	2	1	0	1	2	2	1	1	1	0	1	1	0	1	1	1	0	0	2	n/a	1	0	1	1	1	1	0	2	n/a	0	1	1	1	1	1	2	n/a	No	No	No
21	1	2	2	Sans_Emploi	3	8	1	900000	3	2	1	0	0	2	2	1	1	1	1	0	1	0	0	0	0	0	0	2	n/a	1	0	1	1	1	1	0	2	n/a	0	0	1	1	1	1	2	n/a	No	No	No
30	1	2	3	Sans_Emploi	4	8	1	900000	3	2	2	0	0	2	2	1	1	1	1	1	1	0	1	1	0	0	0	2	n/a	1	0	1	1	0	0	0	2	n/a	0	1	1	1	1	1	2	n/a	No	No	No
28	1	2	2	Sans_Emploi	4	6	1	900000	3	2	2	0	0	2	2	1	1	1	1	1	1	0	0	0	1	0	0	2	n/a	1	0	0	1	1	0	0	2	n/a	0	0	1	1	1	1	2	n/a	No	No	No
24	1	2	2	Profession_liberale	4	5	1	900000	3	2	2	0	0	2	2	1	1	0	0	0	0	0	1	1	0	1	1	2	n/a	1	0	1	1	0	0	1	2	n/a	1	1	1	1	1	1	2	n/a	No	No	No
25	1	2	1	Profession_liberale	4	8	1	900000	3	2	2	0	0	2	2	1	1	1	1	1	0	0	0	0	0	0	0	2	n/a	1	0	1	1	0	1	0	2	n/a	1	0	1	1	1	1	2	n/a	No	No	No
25	1	2	1	Profession_liberale	10	7	1	1200000	3	2	2	0	0	2	2	1	1	0	1	1	0	0	1	1	1	0	0	2	n/a	1	0	1	1	1	1	1	2	n/a	1	0	1	1	1	1	2	n/a	No	No	No
25	1	2	1	Profession_liberale	10	1	1	1350000	3	2	2	0	0	2	2	1	1	0	1	0	0	0	0	1	0	0	0	2	n/a	1	1	1	1	1	1	0	n/a	n/a	1	1	1	1	1	1	n/a	n/a	No	No	No
28	1	2	2	Sans_Emploi	4	4	1	1500000	3	2	2	0	0	2	2	1	1	0	1	1	0	1	1	1	0	0	0	2	n/a	1	0	1	1	1	1	0	2	n/a	1	0	1	1	1	1	2	n/a	No	No	No
25	1	1	3	Profession_liberale	5	7	1	NA	3	2	2	0	0	2	2	1	1	0	0	0	0	0	0	0	0	0	0	2	n/a	1	1	1	1	1	1	0	n/a	n/a	1	1	1	1	1	1	1	n/a	No	No	No
28	1	1	4	Sans_Emploi	3	1	1	500000	3	1	1	1	0	2	2	1	1	1	1	1	1	1	1	1	1	1	1	1	n/a	1	1	1	1	1	1	1	n/a	n/a	1	1	1	1	1	1	1	n/a	No	No	No
39	1	1	3	Profession_liberale	4	2	1	600000	3	1	1	1	0	2	2	1	1	1	1	1	1	1	1	1	1	1	1	1	n/a	1	1	1	1	1	1	1	n/a	n/a	1	1	1	1	1	1	n/a	n/a	No	No	No
29	1	5	4	Fonctionnaire	7	24	1	600000	3	2	3	0	0	2	2	1	1	1	1	1	1	1	1	1	1	1	1	1	Vomissements diarrhées dermatoses conjonctivites	1	1	1	1	1	1	1	1	Corps testé positif	1	1	1	1	1	1	1	Port de gant de lunettes de combinaison	Yes	No	No
29	1	1	3	Sans_Emploi	6	8	1	900000	3	2	2	0	0	2	2	1	1	1	1	1	1	1	1	1	1	1	1	1	n/a	1	1	1	1	1	1	1	1	n/a	1	1	1	1	1	1	1	n/a	No	No	No
25	1	1	4	Sans_Emploi	4	6	1	1050000	3	2	2	0	0	2	2	1	1	1	1	1	1	1	1	1	1	1	1	1	n/a	1	1	1	1	1	1	1	n/a	n/a	1	1	1	1	1	1	n/a	n/a	No	No	No
22	1	1	4	Sans_Emploi	4	7	1	1200000	3	2	2	0	0	2	2	1	1	1	1	1	1	1	1	1	1	1	1	1	n/a	1	1	1	1	1	1	1	n/a	n/a	1	1	1	1	1	1	1	n/a	Yes	No	No
20	1	1	1	Profession_liberale	3	5	1	1500000	3	2	1	0	1	2	2	1	1	1	1	1	1	1	1	1	1	1	1	1	n/a	1	1	1	1	1	1	1	n/a	n/a	1	1	1	1	1	1	n/a	n/a	No	No	No
28	1	1	1	Profession_liberale	4	7	1	1800000	3	2	2	0	0	2	2	1	1	1	1	1	1	1	1	1	1	1	1	1	n/a	1	1	1	1	1	1	1	n/a	n/a	1	1	1	1	1	1	1	n/a	No	No	No
23	1	1	1	Profession_liberale	30	7	1	NA	3	2	2	0	0	2	2	1	1	1	1	1	1	1	1	1	1	1	1	1	n/a	1	1	1	1	1	1	1	n/a	n/a	1	1	1	1	1	1	2	n/a	Yes	No	No
28	1	1	3	Profession_liberale	10	6	1	NA	3	2	2	0	0	2	2	1	1	1	1	1	1	1	1	1	1	1	1	1	n/a	1	1	1	1	1	1	1	n/a	n/a	1	1	1	1	1	1	n/a	n/a	No	No	No
29	1	3	4	Sans_Emploi	5	15	1	0	3	2	2	0	0	2	2	1	1	1	1	1	1	1	1	1	1	1	1	2	n/a	1	1	1	1	1	1	1	2	n/a	1	1	1	1	1	1	2	n/a	No	No	No
22	1	3	3	Sans_Emploi	4	24	1	0	3	2	2	0	0	2	2	1	1	1	1	1	1	1	1	0	0	0	0	2	n/a	1	0	1	1	1	1	0	2	n/a	1	1	1	1	1	1	2	n/a	Yes	No	No
35	1	3	4	Sans_Emploi	8	32	1	0	3	2	2	0	0	2	1	1	1	1	1	1	1	1	1	1	1	1	1	2	n/a	1	1	1	1	1	1	1	2	n/a	1	1	1	1	1	1	2	n/a	No	No	Yes
25	1	2	5	Profession_liberale	8	32	1	150000	3	2	2	0	0	2	2	1	1	1	1	1	1	1	1	1	1	0	0	2	n/a	1	0	1	1	1	1	0	2	n/a	1	0	1	1	1	0	2	n/a	No	No	No
22	1	3	5	Profession_liberale	7	32	1	200000	3	2	2	0	0	2	2	1	1	1	1	1	1	1	1	1	1	1	1	2	n/a	1	1	1	1	1	1	1	2	n/a	1	1	1	1	1	1	2	n/a	No	No	No
20	1	3	1	Profession_liberale	5	15	1	250000	3	2	1	0	1	2	2	1	1	1	1	1	1	1	1	1	1	0	0	2	n/a	1	0	1	1	1	1	0	2	n/a	1	1	1	1	1	1	2	n/a	Yes	No	No
22	1	2	1	Profession_liberale	3	8	1	900000	3	2	1	0	1	2	2	1	1	0	1	1	1	1	1	1	1	0	0	2	n/a	1	0	1	1	1	1	1	2	n/a	1	0	1	1	1	0	2	n/a	No	No	No
20	1	2	1	Sans_Emploi	3	7	1	900000	3	2	1	0	1	2	2	1	1	1	1	1	1	1	1	0	1	0	0	2	n/a	1	1	1	1	1	1	1	2	n/a	1	1	1	1	1	1	2	n/a	No	No	No
26	1	2	3	Profession_liberale	4	6	1	1200000	3	2	2	0	0	2	2	1	1	1	1	1	1	0	1	1	1	0	0	2	n/a	1	0	1	1	1	1	1	2	n/a	1	1	1	1	1	1	2	n/a	No	No	No
30	1	2	1	Profession_liberale	4	7	1	1200000	3	2	2	0	0	2	2	1	1	1	1	1	1	1	1	1	1	1	1	2	n/a	1	1	1	1	1	1	0	2	n/a	1	0	1	1	1	1	2	n/a	No	No	No
26	1	1	4	Profession_liberale	4	6	1	1200000	3	2	2	0	0	2	2	1	1	1	1	1	1	1	1	1	1	1	1	2	n/a	1	1	1	1	1	1	1	2	n/a	1	1	1	1	1	1	2	n/a	No	No	No
29	1	3	3	Profession_liberale	4	4	1	1200000	3	2	2	0	0	2	2	1	1	1	1	1	1	1	1	1	1	0	0	2	n/a	1	0	1	1	1	1	1	2	n/a	1	0	1	1	1	1	2	n/a	No	No	No
28	1	2	1	Sans_Emploi	7	7	1	1200000	3	2	1	0	1	2	2	1	1	1	0	0	1	0	0	0	0	0	0	2	n/a	1	0	1	1	1	1	1	2	n/a	1	1	1	1	1	1	2	n/a	No	No	No
28	1	2	5	Sans_Emploi	5	7	1	1500000	3	2	2	0	0	2	2	1	1	1	1	1	1	1	1	1	1	0	0	2	n/a	1	1	1	1	1	1	1	2	n/a	1	1	1	1	1	1	2	n/a	No	No	No
27	1	2	4	Sans_Emploi	3	6	1	1500000	3	2	1	0	1	2	2	1	1	1	1	1	1	1	0	1	1	0	0	2	n/a	1	0	1	1	1	1	1	2	n/a	1	1	1	1	1	1	2	n/a	No	No	No
28	1	2	4	Sans_Emploi	4	8	1	1800000	3	2	2	0	0	2	2	1	1	1	1	1	1	1	1	1	1	1	1	2	n/a	1	1	1	1	1	1	1	2	n/a	1	1	1	1	1	1	2	n/a	No	No	No
18	2	3	1	Menagere	7	32	2	200000	3	2	1	1	0	2	2	1	1	1	1	1	1	1	1	1	1	0	0	2	n/a	1	1	1	1	1	1	1	2	n/a	1	1	1	1	1	1	2	n/a	No	No	No
26	1	1	4	Profession_liberale	4	1	1	900000	3	2	2	0	0	2	2	1	1	1	1	1	1	0	1	1	1	1	1	n/a	n/a	1	1	1	1	1	1	1	n/a	n/a	1	1	1	1	1	1	n/a	n/a	Yes	No	No
21	1	1	4	Sans_Emploi	3	4	1	900000	3	2	2	0	0	2	2	1	1	1	1	1	1	1	1	1	1	1	1	n/a	n/a	1	1	1	1	1	1	1	n/a	n/a	1	1	1	1	1	1	n/a	n/a	No	No	No
22	1	1	4	Sans_Emploi	5	6	1	900000	3	2	2	0	0	2	2	1	1	1	1	1	1	1	1	1	1	1	1	n/a	n/a	1	1	1	1	1	1	0	n/a	n/a	1	1	1	1	1	1	n/a	n/a	No	No	No
25	1	1	1	Profession_liberale	4	7	1	900000	3	2	2	0	0	2	2	1	1	1	1	1	1	1	1	1	1	0	0	n/a	n/a	1	0	1	1	1	1	0	n/a	n/a	1	0	1	1	1	1	n/a	n/a	Yes	No	No
28	1	2	3	Profession_liberale	8	7	1	1050000	3	2	2	0	0	2	2	1	1	1	1	1	1	1	1	1	1	1	1	n/a	n/a	1	1	1	1	1	1	1	n/a	n/a	1	1	1	1	1	1	1	n/a	No	No	No
26	1	1	3	Sans_Emploi	3	4	1	1200000	3	0	0	2	0	2	2	1	1	1	1	1	1	1	1	1	1	0	0	n/a	n/a	1	1	1	1	1	1	0	n/a	n/a	1	1	1	1	1	1	n/a	n/a	Yes	No	No
31	1	1	4	Sans_Emploi	7	5	1	1500000	3	2	2	0	0	2	2	1	1	1	1	1	1	1	1	1	1	1	1	n/a	n/a	1	1	1	1	1	1	1	1	n/a	1	1	1	1	1	1	1	n/a	No	No	No
23	1	1	4	Sans_Emploi	3	7	1	1500000	3	2	2	0	0	2	2	1	1	1	1	1	1	1	1	1	1	1	1	n/a	n/a	1	1	1	1	1	1	1	n/a	n/a	1	1	1	1	1	1	n/a	n/a	No	No	No
21	1	1	3	Profession_liberale	4	4	1	1500000	3	2	2	0	0	2	1	1	1	1	1	1	1	0	1	1	0	0	0	n/a	n/a	1	0	1	1	1	1	1	n/a	n/a	1	1	1	1	1	1	n/a	n/a	Yes	No	No
30	1	1	1	Profession_liberale	3	7	1	2400000	3	1	1	1	0	2	2	1	1	1	1	1	1	1	1	1	1	1	1	n/a	n/a	1	1	1	1	1	1	1	n/a	n/a	1	1	1	1	1	1	n/a	n/a	No	No	No
19	1	1	1	Profession_liberale	5	9	1	NA	3	0	0	2	0	2	2	1	1	1	1	1	1	1	1	1	1	1	1	n/a	n/a	1	1	1	1	1	1	1	1	n/a	1	1	1	1	1	1	1	n/a	No	No	No
23	1	1	3	Sans_Emploi	4	1	1	0	3	2	2	0	0	2	2	1	1	1	1	1	1	1	1	1	1	1	1	n/a	n/a	1	1	1	1	1	1	1	n/a	n/a	1	1	1	1	1	1	1	n/a	No	No	No
25	1	1	1	Profession_liberale	5	6	1	0	3	2	2	0	0	2	2	1	1	1	1	0	1	1	1	1	1	1	1	n/a	n/a	1	1	1	1	1	1	1	n/a	n/a	1	1	1	1	1	1	1	n/a	No	No	No
27	1	1	3	Sans_Emploi	4	4	2	30000	3	1	1	1	0	2	2	1	1	1	1	1	1	1	1	1	1	1	1	n/a	n/a	1	1	1	1	1	1	0	n/a	n/a	1	1	1	1	1	1	n/a	n/a	Yes	No	No
22	2	1	3	Profession_liberale	8	7	2	NA	3	2	2	0	0	2	2	1	1	1	1	1	1	1	1	1	1	1	1	n/a	n/a	1	1	1	1	1	1	1	n/a	n/a	1	1	1	1	1	1	1	n/a	No	No	No
20	1	1	3	Sans_Emploi	4	1	2	0	3	2	2	0	0	2	2	1	1	1	1	1	1	1	1	1	1	1	1	n/a	n/a	1	1	1	1	1	1	1	n/a	n/a	1	1	1	1	1	1	n/a	n/a	No	No	No
32	1	1	3	Profession_liberale	7	8	1	0	3	1	1	0	1	2	2	1	1	0	0	0	0	0	0	0	0	0	0	2	n/a	0	0	0	0	0	0	0	2	n/a	0	1	1	1	1	1	n/a	n/a	Yes	No	No
24	1	2	1	Profession_liberale	6	4	1	900000	3	2	2	0	0	2	2	1	1	1	1	0	0	0	0	0	0	0	0	2	n/a	1	0	1	1	1	1	0	2	n/a	0	1	1	1	1	1	2	n/a	No	No	No
32	1	2	4	Sans_Emploi	4	7	1	900000	3	2	2	0	0	2	2	1	1	1	1	1	1	0	1	1	0	0	0	2	n/a	1	0	1	1	1	1	1	2	n/a	0	1	1	1	1	1	2	n/a	Yes	No	No
28	1	2	3	Sans_Emploi	5	7	1	1200000	3	2	2	0	0	2	2	1	1	1	1	1	0	0	1	1	1	0	0	2	n/a	1	0	1	1	1	1	0	2	n/a	1	0	1	1	1	0	2	n/a	No	No	No
28	1	2	1	Sans_Emploi	4	7	1	1500000	3	2	2	0	0	2	2	1	1	1	1	1	0	0	0	0	1	0	0	2	n/a	1	0	1	1	1	1	0	2	n/a	1	0	1	1	1	1	2	n/a	No	No	No
42	1	2	3	Profession_liberale	1	1	1	1200000	3	2	0	0	2	2	2	1	1	1	1	1	1	1	1	1	1	1	1	1	n/a	1	1	1	1	1	1	1	n/a	n/a	1	1	1	1	1	1	1	n/a	No	No	No
32	1	1	4	Fonctionnaire	10	9	1	1200000	3	1	1	1	0	2	2	1	1	1	1	1	1	1	1	1	1	1	1	1	n/a	1	1	1	1	1	1	1	1	n/a	1	1	1	1	1	1	n/a	n/a	No	No	No
22	1	1	4	Sans_Emploi	5	6	1	1350000	3	2	2	0	0	2	1	1	1	1	1	1	1	1	1	1	1	1	1	1	n/a	1	1	1	1	1	1	1	n/a	n/a	1	1	1	1	1	1	n/a	n/a	No	No	No
27	1	1	4	Profession_liberale	9	7	1	2100000	3	2	1	0	1	2	2	1	1	1	1	1	1	1	1	1	1	1	1	1	n/a	1	1	1	1	1	1	1	n/a	n/a	1	1	1	1	1	1	n/a	n/a	No	No	No
32	1	1	4	Fonctionnaire	20	6	1	3000000	3	0	0	2	0	2	2	1	1	1	1	1	1	1	1	1	1	1	1	1	n/a	1	1	1	1	1	1	1	1	n/a	1	1	1	1	1	1	1	n/a	No	No	No
20	1	1	3	Sans_Emploi	15	7	1	0	3	2	2	0	0	2	2	1	1	1	1	1	1	1	1	1	1	1	1	1	n/a	1	1	1	1	1	1	0	n/a	n/a	1	1	1	1	1	1	n/a	n/a	No	No	No
30	1	2	1	Profession_liberale	4	5	1	900000	3	2	2	0	0	2	2	1	1	0	1	1	1	1	0	1	1	0	0	2	n/a	1	0	1	1	1	1	1	2	n/a	1	0	1	1	1	1	2	n/a	Yes	No	No
28	1	2	3	Profession_liberale	3	6	1	900000	3	2	2	0	0	2	2	1	1	0	1	1	1	0	0	0	1	0	0	2	n/a	1	1	1	1	1	1	0	2	n/a	1	1	1	1	1	1	2	n/a	Yes	No	No
26	1	2	4	Sans_Emploi	5	7	1	900000	3	2	2	0	0	2	2	1	1	1	1	1	1	1	1	1	1	1	1	2	n/a	1	0	1	1	1	1	0	2	n/a	1	1	1	1	1	1	2	n/a	No	No	No
24	1	2	5	Sans_Emploi	3	8	1	900000	3	2	1	0	1	2	2	1	1	1	1	1	1	1	1	1	1	1	1	2	n/a	1	0	1	1	1	1	1	2	n/a	1	1	1	1	1	1	2	n/a	No	No	No
22	1	2	1	Sans_Emploi	5	7	1	1200000	3	2	2	0	0	2	2	1	1	1	1	1	1	0	0	1	1	0	0	2	n/a	1	0	1	1	1	1	0	2	n/a	1	0	1	1	1	1	2	n/a	No	No	No
30	1	2	1	Sans_Emploi	3	5	1	1200000	3	2	1	0	1	2	2	1	1	1	1	1	1	1	1	1	1	0	0	2	n/a	1	0	1	1	1	1	0	2	n/a	1	0	1	1	1	1	2	n/a	Yes	No	No
34	1	2	5	Profession_liberale	5	5	1	1200000	3	2	2	0	0	2	2	1	1	1	1	1	1	1	1	1	1	1	1	2	n/a	1	0	1	1	1	1	1	2	n/a	1	1	1	1	1	1	2	n/a	No	No	No
27	1	2	4	Sans_Emploi	5	9	1	1500000	3	2	2	0	0	2	2	1	1	1	1	1	1	1	0	1	1	0	0	2	n/a	1	1	1	1	1	1	1	2	n/a	1	0	1	1	1	1	2	n/a	No	No	No
31	1	1	4	Sans_Emploi	6	9	1	600000	3	2	2	0	0	2	1	1	1	1	1	1	1	1	1	1	1	1	1	n/a	n/a	1	1	1	1	1	1	1	n/a	n/a	1	1	1	1	1	1	n/a	n/a	Yes	No	No
29	1	1	1	Profession_liberale	3	7	1	900000	3	1	1	1	0	2	2	1	1	1	1	1	1	1	1	1	1	1	1	n/a	n/a	1	1	1	1	1	1	1	n/a	n/a	1	1	1	1	1	1	n/a	n/a	No	No	No
35	1	1	4	Fonctionnaire	4	6	1	900000	3	2	2	0	0	2	2	1	1	1	1	1	1	1	1	1	1	1	1	n/a	n/a	1	1	1	1	1	1	1	n/a	n/a	1	1	1	1	1	1	n/a	n/a	No	No	No
22	1	1	1	Sans_Emploi	3	4	1	1200000	3	1	1	1	0	2	2	1	1	1	1	1	1	1	1	1	1	1	1	n/a	n/a	1	1	1	1	1	1	0	n/a	n/a	1	1	1	1	1	1	n/a	n/a	Yes	No	No
30	1	1	1	Profession_liberale	2	7	1	1500000	4	2	1	1	1	2	2	1	1	0	0	0	0	0	0	0	0	0	0	2	n/a	0	0	0	0	0	0	0	n/a	n/a	0	1	1	1	1	1	1	n/a	Yes	No	No
28	1	1	4	Sans_Emploi	5	8	1	0	4	3	3	0	0	2	2	1	1	1	1	1	1	1	1	1	1	1	1	1	n/a	1	1	1	1	1	1	1	1	n/a	1	1	1	1	1	1	1	n/a	No	No	No
25	2	3	4	Profession_liberale	8	40	1	200000	4	3	3	0	0	2	2	1	1	1	1	1	1	1	1	1	1	0	0	2	n/a	1	1	1	1	1	1	0	2	n/a	1	1	1	1	1	1	2	n/a	No	No	No
35	1	3	4	Fonctionnaire	7	24	1	500000	4	3	3	0	0	2	2	1	1	1	1	1	1	1	1	1	1	1	1	2	n/a	1	1	1	1	1	1	1	2	n/a	1	1	1	1	1	1	2	n/a	No	No	No
33	1	3	3	Sans_Emploi	7	36	1	0	4	3	2	1	0	2	2	1	1	1	1	1	1	1	1	1	1	0	0	2	n/a	1	0	1	1	1	0	0	2	n/a	0	1	1	1	1	1	2	n/a	No	No	No
20	1	1	3	Profession_liberale	4	6	1	900000	4	1	1	1	1	2	2	1	2	1	1	1	1	0	0	0	0	0	0	2	n/a	1	1	1	1	1	1	0	n/a	n/a	0	0	1	1	1	1	n/a	n/a	Yes	No	No
35	1	1	2	Profession_liberale	4	4	1	0	4	3	3	0	0	2	2	1	1	1	1	1	1	1	1	1	1	1	1	1	n/a	1	1	1	1	1	1	1	1	n/a	1	1	1	1	1	1	1	n/a	No	No	No
27	1	3	4	Sans_Emploi	8	32	1	0	4	3	3	0	0	2	2	1	1	1	1	1	1	1	1	1	0	0	0	2	n/a	1	0	1	1	1	1	0	2	n/a	1	1	1	1	1	1	2	n/a	No	No	No
28	1	1	5	Fonctionnaire	3	10	1	1500000	4	2	2	1	0	2	2	1	1	1	1	1	1	1	1	1	1	1	1	n/a	n/a	1	0	1	1	1	1	1	n/a	n/a	1	1	1	1	1	1	n/a	n/a	No	No	No
32	1	2	1	Profession_liberale	5	8	1	900000	4	3	3	0	0	2	2	1	1	1	1	0	0	0	1	1	1	0	0	2	n/a	1	0	1	1	0	0	0	2	n/a	0	1	1	1	1	1	2	n/a	No	No	No
32	1	2	1	Profession_liberale	5	5	1	1500000	4	3	3	0	0	2	2	1	1	0	0	0	0	0	0	0	0	0	0	2	n/a	1	0	1	0	0	0	0	2	n/a	0	0	1	1	0	0	2	n/a	No	No	No
32	1	3	1	Profession_liberale	9	24	1	250000	4	2	2	1	0	2	2	1	1	1	1	1	1	1	1	0	0	0	0	2	n/a	1	0	1	0	0	0	0	2	n/a	0	1	1	1	1	0	2	n/a	No	No	No
30	1	2	2	Profession_liberale	10	7	1	1000000	4	3	0	0	0	2	2	1	1	1	0	1	1	0	1	1	1	0	0	2	n/a	1	0	0	0	0	0	0	2	n/a	0	1	1	1	1	1	2	n/a	Yes	No	No
30	2	2	2	Profession_liberale	8	36	1	250000	4	3	3	0	0	2	2	1	1	1	1	0	1	1	1	1	0	0	0	2	n/a	0	0	1	1	1	1	0	2	n/a	1	1	1	1	0	0	2	n/a	Yes	No	No
34	1	2	1	Profession_liberale	5	8	1	1200000	4	3	3	0	0	2	2	1	1	1	1	1	0	0	1	1	1	0	0	2	n/a	1	0	1	1	1	1	0	2	n/a	1	0	1	1	1	1	2	n/a	Yes	No	No
26	1	1	3	Sans_Emploi	3	9	1	1500000	4	3	3	0	1	2	2	1	1	0	0	1	0	1	1	1	1	1	1	n/a	n/a	1	1	1	1	1	1	1	n/a	n/a	1	1	1	1	1	1	n/a	n/a	Yes	No	No
30	1	3	4	Profession_liberale	5	32	1	500000	4	3	3	0	0	2	2	1	1	1	1	1	1	1	1	1	1	1	1	1	Dermatoses,vomissements,diarrhées	1	1	1	1	1	1	1	2	n/a	1	1	1	1	1	1	2	n/a	Yes	No	No
35	1	3	3	Profession_liberale	7	24	2	400000	4	3	3	0	0	2	2	1	1	1	1	1	1	1	1	1	0	0	0	1	Vomissements	1	0	1	1	1	1	0	2	n/a	1	1	1	1	1	1	2	n/a	Yes	No	No
24	1	2	4	Sans_Emploi	7	36	1	0	4	3	2	0	1	2	2	1	1	1	1	1	1	1	1	1	1	0	0	2	n/a	1	1	1	1	1	1	1	2	n/a	1	1	1	1	1	1	2	n/a	Yes	No	No
28	1	3	2	Sans_Emploi	5	32	1	0	4	3	3	0	0	2	2	1	1	1	1	1	1	1	1	1	1	0	0	2	n/a	1	1	1	1	1	1	1	2	n/a	1	1	1	1	1	0	2	n/a	No	No	No
32	1	4	1	Sans_Emploi	5	32	1	0	4	3	3	0	0	2	2	1	1	1	1	1	1	1	1	1	1	0	0	2	n/a	1	0	1	1	1	1	0	2	n/a	1	1	1	1	1	1	2	n/a	No	No	No
29	1	3	1	Profession_liberale	7	34	1	500000	4	3	3	0	0	2	2	1	1	1	1	1	1	1	1	1	0	0	0	2	n/a	1	1	1	1	1	1	0	2	n/a	1	1	1	1	1	1	2	n/a	No	No	No
36	3	4	4	Profession_liberale	7	32	1	650000	4	3	3	0	0	2	1	1	1	1	1	1	1	1	1	1	1	1	1	2	n/a	1	1	1	1	1	1	1	2	n/a	1	1	1	1	1	1	2	n/a	Yes	No	No
30	1	2	1	Sans_Emploi	5	4	1	1200000	4	3	3	0	0	2	2	1	1	1	1	1	1	1	0	1	0	0	0	2	n/a	1	0	1	1	1	1	0	2	n/a	1	0	1	1	1	1	2	n/a	No	No	No
30	3	3	4	Sans_Emploi	15	28	2	0	4	3	3	1	0	2	2	1	1	1	1	1	1	1	1	1	1	0	0	2	n/a	1	0	1	1	1	1	0	2	n/a	1	1	1	1	1	1	2	n/a	Yes	No	No
25	1	2	1	Sans_Emploi	5	7	1	1000000	4	3	3	0	0	2	2	1	1	1	0	0	0	1	1	1	1	0	0	2	n/a	0	0	1	1	1	1	1	2	n/a	0	1	1	1	1	1	2	n/a	No	No	No
30	1	2	1	Profession_liberale	5	8	1	1200000	4	3	3	0	0	2	2	1	1	1	0	0	0	0	1	1	1	0	0	2	n/a	1	0	1	1	0	0	0	2	n/a	0	1	1	1	1	1	2	n/a	Yes	No	No
30	1	4	1	Sans_Emploi	5	9	1	1200000	4	3	3	0	0	2	2	1	1	0	0	0	0	0	0	1	1	0	0	2	n/a	1	0	1	1	1	0	1	2	n/a	0	0	1	1	1	1	2	n/a	No	No	No
30	1	2	2	Sans_Emploi	8	6	1	1500000	4	3	3	0	0	2	2	1	1	1	1	0	0	0	1	0	1	0	0	2	n/a	1	0	1	1	1	1	1	2	n/a	0	1	1	1	1	1	2	n/a	Yes	No	No
28	1	2	3	Sans_Emploi	5	8	1	1000000	4	3	0	0	0	2	2	1	1	1	1	1	1	0	1	1	1	1	1	2	n/a	1	0	1	1	1	1	0	2	n/a	0	1	1	1	1	1	2	n/a	No	No	No
29	1	2	1	Sans_Emploi	8	8	1	1200000	4	2	3	0	0	2	2	1	1	1	1	1	1	1	1	1	1	0	0	2	n/a	1	0	1	1	1	0	0	2	n/a	0	0	1	1	1	1	2	n/a	No	No	No
33	1	1	4	Profession_liberale	8	5	1	3000000	4	3	3	0	0	2	2	1	1	1	1	1	1	1	1	1	1	0	0	2	n/a	1	0	1	1	1	1	0	2	n/a	0	1	1	1	1	1	2	n/a	Yes	No	No
30	1	1	3	Profession_liberale	6	5	1	800000	4	3	3	0	0	2	2	1	1	1	0	0	0	0	0	0	0	0	0	2	n/a	0	0	0	0	0	0	0	n/a	n/a	1	1	1	1	1	1	n/a	n/a	No	No	No
30	1	1	3	Profession_liberale	6	5	1	NA	4	3	3	0	0	2	2	1	1	0	0	0	0	0	0	0	0	0	0	n/a	n/a	0	1	1	1	1	1	1	1	n/a	1	1	1	1	1	1	n/a	n/a	No	No	No
27	1	2	1	Sans_Emploi	4	7	1	900000	4	3	3	0	0	2	2	1	1	1	0	0	0	0	1	1	0	0	0	2	n/a	1	0	1	1	1	1	0	2	n/a	1	1	1	1	1	1	2	n/a	No	No	No
30	1	2	1	Sans_Emploi	5	6	1	1200000	4	3	3	0	0	2	2	1	1	1	1	1	0	0	1	1	1	0	0	2	n/a	1	0	1	1	1	1	1	2	n/a	1	0	1	1	1	1	2	n/a	Yes	No	No
35	1	2	1	Profession_liberale	12	5	1	1500000	4	3	3	0	0	2	2	1	1	0	0	1	0	0	0	1	0	0	0	2	n/a	1	0	1	1	1	1	0	2	n/a	1	0	1	1	1	1	2	n/a	No	No	No
32	1	2	3	Sans_Emploi	7	6	1	1500000	4	3	3	0	0	2	2	1	1	1	1	1	0	1	1	1	1	0	0	2	n/a	1	0	1	1	1	1	0	2	n/a	1	1	1	1	1	1	2	n/a	Yes	No	No
35	1	2	3	Sans_Emploi	5	6	1	1500000	4	3	3	0	0	2	2	1	1	1	1	0	0	0	0	0	1	0	0	2	n/a	1	0	1	1	1	1	0	2	n/a	1	0	1	1	1	1	2	n/a	No	No	No
24	1	1	1	Profession_liberale	3	6	1	300000	4	1	1	2	0	2	2	1	1	0	1	1	1	1	1	1	1	1	1	1	n/a	1	1	1	1	1	1	1	n/a	n/a	1	0	1	1	1	1	1	n/a	No	No	No
28	1	1	1	Profession_liberale	7	6	1	900000	4	3	2	0	1	2	2	1	1	1	1	1	1	1	0	0	1	1	1	1	n/a	1	1	1	1	1	1	1	n/a	n/a	1	1	1	1	1	1	n/a	n/a	Yes	No	No
25	1	1	3	Profession_liberale	4	6	1	900000	4	2	2	1	0	2	2	1	1	1	1	1	1	1	1	1	1	1	1	1	n/a	1	1	1	1	1	1	0	n/a	n/a	1	1	1	1	1	1	n/a	n/a	Yes	No	No
26	1	2	4	Sans_Emploi	7	3	1	1050000	4	3	3	0	0	2	2	1	1	1	1	1	1	1	1	1	1	0	1	1	n/a	1	1	1	1	1	1	1	n/a	n/a	1	1	1	1	1	1	n/a	n/a	No	No	No
30	1	1	2	Profession_liberale	5	3	1	1200000	4	3	3	0	0	2	2	1	1	1	1	1	1	1	1	1	1	1	1	1	n/a	1	1	1	1	1	1	1	n/a	n/a	1	1	1	1	1	1	1	n/a	Yes	No	No
24	1	1	5	Sans_Emploi	10	7	1	1200000	4	3	3	0	0	2	2	1	1	1	1	1	1	1	1	1	1	1	1	1	n/a	1	1	1	1	1	1	1	n/a	n/a	1	1	1	1	1	1	1	n/a	No	No	No
32	1	1	1	Profession_liberale	7	8	1	NA	4	2	2	0	0	2	2	1	1	1	1	1	1	1	1	1	1	1	1	1	n/a	1	1	1	1	1	1	1	1	n/a	1	1	1	1	1	1	1	n/a	Yes	No	No
29	1	1	4	Fonctionnaire	4	7	1	0	4	3	3	0	0	2	2	1	1	1	1	1	1	1	1	1	1	1	1	1	n/a	1	1	1	1	1	1	0	n/a	n/a	1	1	1	1	1	1	n/a	n/a	No	No	No
23	1	1	1	Sans_Emploi	5	9	1	0	4	3	3	0	0	2	2	1	1	1	1	1	1	1	1	1	1	1	1	1	n/a	1	1	1	1	1	1	1	n/a	n/a	1	1	1	1	1	1	n/a	n/a	No	No	No
25	1	1	3	Sans_Emploi	4	7	1	0	4	2	2	1	0	2	2	1	1	1	1	1	1	1	1	1	1	1	1	1	n/a	1	1	1	1	1	1	1	n/a	n/a	1	0	1	1	1	1	n/a	n/a	No	No	No
27	1	1	1	Sans_Emploi	3	8	1	0	4	3	3	0	0	2	2	1	1	1	1	1	1	1	1	1	1	1	1	1	n/a	1	1	1	1	1	1	1	n/a	n/a	1	0	1	1	1	1	1	n/a	No	No	No
27	1	3	4	Sans_Emploi	5	24	1	0	4	3	3	0	0	2	2	1	1	1	1	1	1	1	1	1	1	0	0	2	n/a	1	0	1	1	1	1	0	2	n/a	1	1	1	1	1	1	2	n/a	No	No	No
33	2	3	4	Sans_Emploi	8	36	1	0	4	3	2	1	0	2	2	1	1	1	1	1	1	1	1	1	1	1	1	2	n/a	1	1	1	1	1	1	1	2	n/a	1	1	1	1	1	1	2	n/a	No	No	No
34	1	3	1	Profession_liberale	6	28	1	350000	4	3	3	0	0	2	2	1	1	1	1	1	1	1	1	1	1	0	0	2	n/a	1	0	1	1	1	1	0	2	n/a	1	1	1	1	1	1	2	n/a	No	No	No
27	1	3	4	Employe_Prive	5	19	1	700000	4	3	2	0	1	2	2	1	1	1	1	1	1	1	1	1	1	1	1	2	n/a	1	1	1	1	1	1	1	2	n/a	1	1	1	1	1	1	1	Port de gants	Yes	No	No
22	1	2	1	Profession_liberale	3	6	1	900000	4	4	1	0	2	2	2	1	1	1	1	1	1	1	0	1	1	0	1	2	n/a	1	1	1	1	1	1	0	2	n/a	1	1	1	1	1	1	2	n/a	No	No	No
29	1	2	1	Profession_liberale	5	9	1	1200000	4	3	3	0	0	2	2	1	1	1	1	1	1	1	0	0	1	0	0	2	n/a	1	0	1	1	1	1	1	2	n/a	1	1	1	1	1	1	2	n/a	Yes	No	No
30	1	2	1	Profession_liberale	5	5	1	1200000	4	3	2	0	1	2	2	1	1	1	1	1	1	0	1	1	1	0	0	2	n/a	1	0	1	1	0	1	1	2	n/a	1	0	1	1	1	1	2	n/a	No	No	No
30	1	2	5	Fonctionnaire	5	5	1	1200000	4	3	3	0	0	2	2	1	1	1	1	1	1	1	1	1	1	1	1	2	n/a	1	0	1	1	1	1	1	2	n/a	1	1	1	1	1	1	2	n/a	No	No	No
36	1	2	5	Sans_Emploi	6	3	1	1200000	4	3	3	0	0	2	2	1	1	1	1	1	1	1	0	1	1	0	0	2	n/a	1	0	1	1	1	1	1	2	n/a	1	1	1	1	1	1	2	n/a	No	No	No
35	1	2	4	Sans_Emploi	5	4	1	1200000	4	3	3	0	0	2	2	1	1	1	1	1	1	0	1	1	1	1	1	2	n/a	1	0	1	1	1	1	1	2	n/a	1	1	1	1	1	1	2	n/a	No	No	No
30	1	2	3	Sans_Emploi	4	6	1	1200000	4	3	2	0	1	2	2	1	1	1	1	1	1	0	1	1	1	0	0	2	n/a	1	0	1	1	1	1	0	2	n/a	1	0	1	1	1	1	2	n/a	No	No	No
35	1	2	1	Sans_Emploi	6	7	1	1200000	4	3	3	0	0	2	2	1	1	1	1	1	1	0	1	1	1	0	0	2	n/a	1	0	1	1	1	1	1	2	n/a	1	0	1	1	1	1	2	n/a	No	No	No
34	1	2	2	Profession_liberale	4	9	1	1500000	4	3	2	0	1	2	2	1	1	1	1	1	1	1	1	1	1	0	0	2	n/a	1	0	1	1	1	1	1	2	n/a	1	0	1	1	1	1	2	n/a	No	No	No
32	1	2	1	Sans_Emploi	10	8	1	1500000	4	3	3	0	0	2	2	1	1	1	1	0	1	0	0	1	1	0	0	2	n/a	1	0	1	1	1	1	0	2	n/a	1	0	1	1	1	1	2	n/a	No	No	No
28	1	2	4	Employe_Prive	5	5	1	1800000	4	3	3	0	0	2	2	1	1	1	1	1	1	1	1	1	1	1	1	2	n/a	1	1	1	1	0	1	1	2	n/a	1	1	1	1	1	1	2	n/a	No	No	No
30	1	2	4	Employe_Prive	5	4	1	1800000	4	3	3	0	0	2	2	1	1	1	1	1	1	1	1	1	1	1	1	2	n/a	1	1	1	1	1	1	1	2	n/a	1	1	1	1	1	1	2	n/a	No	No	No
24	1	2	4	Sans_Emploi	6	6	1	1800000	4	3	3	0	0	2	2	1	1	0	1	1	1	1	1	0	0	1	1	2	n/a	1	0	1	1	1	1	1	2	n/a	1	1	1	1	1	1	2	n/a	No	No	No
35	1	1	1	Profession_liberale	5	5	1	600000	4	3	3	0	0	2	2	1	1	1	1	1	1	1	1	1	1	1	1	n/a	n/a	1	1	1	1	1	1	1	n/a	n/a	1	1	1	1	1	1	1	n/a	No	No	No
29	1	1	3	Sans_Emploi	3	8	1	900000	4	3	3	0	0	2	2	1	1	1	1	1	1	1	1	1	1	1	1	n/a	n/a	1	1	1	1	0	1	1	n/a	n/a	1	1	1	1	1	1	n/a	n/a	No	No	No
30	1	1	5	Sans_Emploi	5	4	1	900000	4	3	3	0	0	2	2	1	1	1	1	1	1	1	1	1	1	1	1	n/a	n/a	1	1	1	1	1	1	1	n/a	n/a	1	1	1	1	1	1	n/a	n/a	Yes	No	No
25	1	1	3	Sans_Emploi	4	4	1	1200000	4	2	2	1	0	2	2	1	1	1	1	1	1	1	1	1	1	1	1	n/a	n/a	1	1	1	1	1	1	1	n/a	n/a	1	1	1	1	1	1	2	n/a	No	No	No
25	1	1	2	Profession_liberale	6	1	1	2100000	4	3	3	0	0	2	2	1	1	1	1	1	1	1	1	1	1	1	1	n/a	n/a	1	1	1	1	1	1	1	n/a	n/a	1	1	1	1	1	1	1	n/a	No	No	No
24	1	1	1	Profession_liberale	5	7	1	NA	4	3	2	0	1	2	1	1	1	1	1	1	1	1	1	1	1	1	1	n/a	n/a	1	1	1	1	1	1	0	n/a	n/a	1	1	1	1	1	1	n/a	n/a	No	No	No
24	1	2	1	Profession_liberale	4	8	1	NA	4	0	0	3	0	2	1	1	1	1	1	1	1	1	1	1	1	1	1	n/a	n/a	1	1	1	1	1	1	1	n/a	n/a	1	1	1	1	1	1	n/a	n/a	No	No	No
25	1	1	2	Profession_liberale	10	6	1	NA	4	3	3	0	0	2	2	1	1	1	1	1	1	1	1	1	1	1	1	n/a	n/a	1	1	1	1	1	1	1	1	n/a	1	1	1	1	1	1	n/a	n/a	No	No	No
26	1	1	1	Profession_liberale	5	2	1	3000000	4	2	2	0	1	2	2	1	1	0	0	0	0	0	0	0	0	0	0	n/a	n/a	0	0	0	0	0	0	0	n/a	n/a	0	1	1	1	1	1	n/a	n/a	No	No	No
40	1	2	3	Fonctionnaire	4	5	1	1200000	4	3	2	0	1	2	2	1	1	0	0	0	0	0	1	1	0	0	0	2	n/a	1	0	0	1	0	0	0	2	n/a	0	1	1	1	1	1	2	n/a	No	No	No
26	1	1	1	Profession_liberale	5	4	1	750000	4	3	3	0	0	2	2	1	1	0	0	0	0	0	0	0	0	0	0	2	n/a	0	0	0	0	0	0	0	n/a	n/a	1	1	1	1	1	1	1	n/a	No	No	No
28	1	2	3	Sans_Emploi	4	1	1	2100000	4	2	2	1	0	2	2	1	1	1	1	1	1	1	1	1	1	1	1	1	n/a	1	1	1	1	1	1	1	n/a	n/a	1	1	1	1	1	1	n/a	n/a	No	No	No
40	1	2	5	Fonctionnaire	9	5	1	1200000	4	3	3	0	0	2	2	1	1	1	1	1	1	0	1	1	1	1	1	2	n/a	1	0	1	1	1	1	1	2	n/a	1	1	1	1	1	1	2	n/a	Yes	No	No
28	1	2	3	Sans_Emploi	5	4	1	1500000	4	3	3	0	0	2	2	1	1	1	1	1	1	1	1	1	1	0	0	2	n/a	1	0	1	1	1	1	0	2	n/a	1	0	1	1	1	1	2	n/a	No	No	No
34	1	2	4	Profession_liberale	4	6	1	1800000	4	3	2	0	1	2	2	1	1	1	1	1	1	0	0	1	1	1	1	2	n/a	1	1	1	1	1	1	1	2	n/a	1	1	1	1	1	1	2	n/a	No	No	No
23	1	2	5	Sans_Emploi	5	7	1	1500000	4	2	2	1	0	2	2	1	1	1	1	1	1	1	1	1	1	1	1	n/a	n/a	1	1	1	1	1	1	1	n/a	n/a	1	1	1	1	1	1	1	n/a	No	No	No
30	1	1	4	Fonctionnaire	8	5	1	1500000	4	3	2	0	1	2	2	1	1	1	1	1	1	1	1	1	1	1	1	n/a	n/a	1	1	1	1	1	1	0	n/a	n/a	1	1	1	1	1	1	n/a	n/a	No	No	No
39	1	1	4	Employe_Prive	11	9	1	2250000	4	3	3	0	0	2	1	1	1	1	1	1	1	1	1	1	1	1	1	n/a	n/a	1	1	1	1	1	1	1	n/a	n/a	1	1	1	1	1	1	n/a	n/a	No	No	No
28	1	2	4	Fonctionnaire	8	6	1	0	4	2	2	1	1	2	2	1	1	1	1	1	1	1	1	1	1	1	1	n/a	n/a	1	1	1	1	1	1	1	n/a	n/a	1	1	1	1	1	1	1	n/a	No	No	No
36	1	3	1	Sans_Emploi	6	24	1	0	5	4	4	0	0	2	2	1	1	1	1	1	1	1	1	1	0	0	0	2	n/a	1	0	1	0	0	0	0	2	n/a	0	1	1	1	1	0	2	n/a	No	No	No
38	1	4	3	Profession_liberale	5	36	1	500000	5	4	4	0	0	2	2	1	1	1	1	1	1	1	1	1	1	0	0	2	n/a	1	1	1	1	1	1	1	2	n/a	1	1	1	1	1	1	2	n/a	No	No	No
28	1	1	1	Profession_liberale	4	1	1	1200000	5	2	2	2	0	2	2	1	1	0	0	0	0	0	0	0	0	0	0	2	n/a	0	0	0	0	0	0	0	n/a	n/a	0	0	0	0	0	0	2	n/a	No	No	No
36	1	4	1	Sans_Emploi	6	36	1	0	5	4	3	1	0	2	2	1	1	1	1	1	1	1	1	1	1	0	0	2	n/a	1	0	1	1	1	1	0	2	n/a	1	1	1	1	1	1	2	n/a	Yes	No	No
35	1	3	1	Profession_liberale	7	32	1	500000	5	4	4	0	0	2	2	1	1	1	1	1	1	1	1	1	0	0	0	2	n/a	1	0	1	1	1	1	0	2	n/a	1	1	1	1	1	1	2	n/a	Yes	No	No
35	1	3	2	Employe_Prive	12	36	1	2500000	5	4	4	0	0	2	2	1	1	1	1	1	1	1	1	1	1	1	1	2	n/a	1	1	1	1	1	1	1	2	n/a	1	1	1	1	1	1	2	n/a	No	No	No
37	1	3	5	Profession_liberale	8	24	2	500000	5	4	3	0	1	2	2	1	1	1	1	1	1	1	1	1	1	0	0	2	n/a	1	1	1	1	1	1	0	2	n/a	1	1	1	1	1	1	2	n/a	Yes	No	No
35	1	3	1	Sans_Emploi	8	32	1	0	5	4	4	0	0	2	2	1	1	1	1	1	1	1	1	1	0	0	0	2	n/a	0	0	1	0	0	0	0	2	n/a	0	0	1	1	0	0	2	n/a	No	No	No
26	1	2	1	Profession_liberale	8	5	1	1500000	5	4	4	0	0	2	2	1	1	1	1	0	0	0	0	0	0	0	0	2	n/a	1	0	1	1	0	0	0	2	n/a	0	0	1	1	1	1	2	n/a	No	No	No
25	1	2	2	Sans_Emploi	9	36	1	0	5	4	3	0	1	2	2	1	1	1	1	1	1	1	1	1	1	0	0	2	n/a	0	0	1	1	1	1	0	2	n/a	1	1	1	1	1	1	2	n/a	No	No	No
30	1	2	5	Sans_Emploi	5	5	1	1200000	5	3	3	1	0	2	2	1	1	1	1	1	1	0	0	1	0	0	0	2	n/a	1	0	1	1	1	1	1	2	n/a	1	1	1	1	1	1	2	n/a	No	No	No
34	1	1	2	Sans_Emploi	6	6	1	1650000	5	3	3	1	0	2	2	1	1	0	1	1	1	1	1	1	1	1	1	2	n/a	1	0	1	1	1	1	1	n/a	n/a	1	1	1	1	1	1	n/a	n/a	Yes	No	No
30	1	3	3	Profession_liberale	8	28	1	NA	5	4	3	0	1	2	2	1	1	1	1	1	1	1	1	1	1	0	0	2	n/a	1	0	1	1	1	1	0	2	n/a	1	1	1	1	1	1	2	n/a	Yes	Yes	No
30	1	1	3	Profession_liberale	6	8	1	0	5	4	4	0	0	2	2	1	1	0	0	0	0	0	0	0	0	0	0	n/a	n/a	0	0	0	0	0	0	0	n/a	n/a	0	0	0	0	0	0	2	n/a	No	No	No
33	1	1	4	Profession_liberale	10	2	1	1800000	5	4	4	0	0	2	2	1	1	1	1	1	1	1	1	1	1	1	1	1	n/a	0	0	0	0	0	0	0	n/a	n/a	0	0	0	0	0	0	2	n/a	No	No	No
25	1	2	1	Sans_Emploi	8	7	1	1000000	5	4	4	0	0	2	2	1	1	1	1	0	1	0	0	0	1	0	0	2	n/a	1	0	1	1	1	1	1	2	n/a	0	1	1	1	1	1	2	n/a	No	No	No
37	1	2	1	Profession_liberale	7	5	1	1200000	5	4	3	0	1	2	2	1	1	1	0	0	1	0	1	1	0	0	0	2	n/a	1	0	1	1	0	1	0	2	n/a	0	1	1	1	1	1	2	n/a	No	No	No
31	1	1	5	Profession_liberale	3	7	1	750000	5	3	2	1	1	2	1	1	1	1	1	1	1	0	0	1	1	1	1	n/a	n/a	0	1	1	1	1	1	0	n/a	n/a	1	1	1	1	1	1	n/a	n/a	Yes	No	No
32	1	1	1	Profession_liberale	6	9	1	600000	5	4	4	0	0	2	2	1	1	0	0	0	0	0	0	0	0	0	0	2	n/a	1	1	1	1	1	1	0	n/a	n/a	1	1	1	1	1	1	n/a	n/a	No	No	No
30	1	1	1	Sans_Emploi	6	9	1	1200000	5	4	4	0	0	2	2	1	1	1	1	1	1	1	1	1	1	1	1	1	n/a	1	1	1	1	1	1	1	n/a	n/a	1	1	1	1	1	1	n/a	n/a	No	No	No
30	1	1	1	Profession_liberale	3	1	1	1500000	5	3	3	1	0	2	2	1	1	1	1	1	1	1	1	1	1	1	1	1	n/a	1	1	1	1	1	1	1	n/a	n/a	1	1	1	1	1	1	n/a	n/a	No	No	No
33	1	1	1	Profession_liberale	5	2	1	2400000	5	4	3	0	1	2	2	1	1	1	1	1	1	1	1	1	1	1	1	1	n/a	1	1	1	1	1	1	1	n/a	n/a	1	1	1	1	1	1	1	n/a	No	No	No
27	1	1	2	Profession_liberale	6	5	1	0	5	4	4	0	0	2	2	1	1	1	1	1	1	1	1	1	1	1	1	1	n/a	1	1	1	1	1	1	1	n/a	n/a	1	1	1	1	1	1	1	n/a	No	No	No
25	1	2	2	Sans_Emploi	8	20	1	0	5	4	3	1	0	2	2	1	1	1	1	1	1	1	1	1	1	0	0	2	n/a	1	0	1	1	1	1	1	2	n/a	1	1	1	1	1	1	2	n/a	Yes	No	No
37	1	3	1	Profession_liberale	11	32	1	300000	5	4	4	0	0	2	2	1	1	1	1	1	1	1	1	1	1	1	1	2	n/a	1	1	1	1	1	1	1	2	n/a	1	1	1	1	1	1	2	n/a	Yes	Yes	No
35	1	2	4	Profession_liberale	4	4	1	1200000	5	3	2	1	1	2	1	1	1	1	1	1	1	1	0	1	1	1	0	2	n/a	1	0	1	1	1	1	0	2	n/a	1	1	1	1	1	1	2	n/a	No	No	No
36	1	2	1	Sans_Emploi	5	5	1	1200000	5	4	3	0	1	2	2	1	1	1	1	1	1	0	1	0	1	0	0	2	n/a	1	0	1	1	1	1	0	2	n/a	1	0	1	1	1	0	2	n/a	No	No	No
36	1	2	1	Sans_Emploi	5	8	1	1200000	5	4	4	0	0	2	2	1	1	1	1	1	1	1	1	1	1	0	0	2	n/a	1	0	1	1	1	1	1	2	n/a	1	0	1	1	0	1	2	n/a	No	No	No
37	1	2	2	Profession_liberale	4	7	1	1500000	5	4	4	0	0	2	2	1	1	1	1	1	1	0	1	1	1	0	0	2	n/a	1	0	1	1	1	1	1	2	n/a	1	0	1	1	1	1	2	n/a	Yes	No	No
31	1	2	3	Sans_Emploi	5	4	1	1800000	5	4	4	0	0	2	2	1	1	1	1	1	1	1	1	1	1	1	1	2	n/a	1	0	1	1	1	1	0	2	n/a	1	1	1	1	1	1	2	n/a	Yes	No	No
22	1	1	1	Profession_liberale	4	7	1	900000	5	4	4	0	0	2	2	1	1	1	1	1	1	1	1	1	1	1	1	n/a	n/a	1	1	1	1	1	1	1	n/a	n/a	1	1	1	1	1	1	n/a	n/a	No	No	No
35	1	1	1	Profession_liberale	5	2	1	1050000	5	4	2	0	2	2	2	1	1	1	1	1	1	1	1	1	1	1	1	n/a	n/a	1	1	1	1	1	1	0	n/a	n/a	1	1	1	1	1	1	n/a	n/a	Yes	No	No
29	1	1	1	Profession_liberale	6	6	1	1050000	5	4	4	0	0	2	2	1	1	1	1	1	1	1	1	1	1	1	1	n/a	n/a	1	1	1	1	1	1	1	n/a	n/a	1	1	1	1	1	1	1	n/a	Yes	No	No
28	1	1	3	Sans_Emploi	5	9	1	1500000	5	3	3	1	0	2	2	1	1	1	1	1	1	1	1	1	1	1	1	n/a	n/a	1	1	1	1	1	1	1	n/a	n/a	1	1	1	1	1	1	n/a	n/a	Yes	No	No
32	1	1	2	Profession_liberale	7	9	1	1500000	5	4	4	1	0	2	1	1	1	1	1	1	1	1	1	1	1	1	1	n/a	n/a	1	0	1	1	1	1	1	n/a	n/a	1	1	1	1	1	1	n/a	n/a	Yes	No	No
23	1	1	3	Fonctionnaire	6	8	1	3900000	5	4	4	0	0	2	2	1	1	1	1	1	1	1	1	1	1	1	1	n/a	n/a	1	1	1	1	1	1	0	n/a	n/a	1	0	1	1	1	1	1	n/a	Yes	No	No
28	1	1	5	Fonctionnaire	8	2	1	0	5	4	4	0	0	2	2	1	1	1	1	1	1	1	1	1	1	1	1	n/a	n/a	1	1	1	1	1	1	1	n/a	n/a	1	1	1	1	1	1	n/a	n/a	No	No	No
23	1	2	2	Profession_liberale	3	9	1	0	5	4	4	0	0	2	2	1	1	1	1	1	1	1	1	1	1	1	1	n/a	n/a	1	1	1	1	1	1	1	n/a	n/a	1	1	1	1	1	1	n/a	n/a	No	No	No
40	1	2	1	Sans_Emploi	5	9	1	900000	5	4	4	0	0	2	2	1	1	1	1	1	0	1	0	1	1	0	0	2	n/a	1	0	1	1	1	1	0	2	n/a	1	0	1	1	1	0	2	n/a	Yes	No	No
24	1	2	2	Profession_liberale	5	8	1	1200000	5	3	3	1	0	2	2	1	1	1	1	1	0	0	1	1	1	0	0	2	n/a	1	0	1	1	1	1	1	2	n/a	1	0	1	1	0	0	2	n/a	Yes	No	No
35	1	2	1	Sans_Emploi	9	4	1	1200000	5	4	4	0	0	2	2	1	1	1	1	1	0	0	1	1	1	0	0	2	n/a	1	0	1	1	1	1	1	2	n/a	1	0	1	1	1	1	2	n/a	No	No	No
35	1	3	1	Profession_liberale	8	18	1	250000	5	3	5	0	0	2	2	1	1	1	1	1	1	1	1	1	1	0	0	2	n/a	1	0	1	1	1	1	1	2	n/a	1	1	1	1	1	1	2	n/a	Yes	Yes	No
32	1	2	2	Profession_liberale	5	3	1	900000	5	4	3	0	1	2	2	1	1	1	1	1	1	0	0	0	1	0	0	2	n/a	1	0	1	1	1	1	1	2	n/a	1	1	1	1	1	1	2	n/a	Yes	No	No
30	1	2	2	Sans_Emploi	8	8	1	1500000	5	4	3	0	1	2	2	1	1	1	1	1	1	1	1	0	1	0	0	2	n/a	1	0	1	1	1	1	0	2	n/a	1	0	1	1	1	1	2	n/a	No	No	No
30	1	2	1	Sans_Emploi	5	7	1	1500000	5	4	4	0	0	2	2	1	1	1	1	1	1	1	1	1	1	0	0	2	n/a	1	0	1	1	1	1	1	2	n/a	1	0	1	1	1	1	2	n/a	No	No	No
32	1	1	4	Sans_Emploi	3	5	1	1200000	5	4	4	0	0	1	2	1	1	1	1	1	1	1	1	1	1	1	1	n/a	n/a	1	1	1	1	1	1	0	2	n/a	1	1	1	1	1	1	1	n/a	Yes	No	No
34	1	1	1	Profession_liberale	6	6	1	1200000	6	6	3	0	2	2	2	1	1	0	0	0	0	0	0	0	0	0	0	n/a	n/a	0	0	0	0	0	0	0	2	n/a	0	0	1	1	0	0	n/a	n/a	No	No	No
35	1	2	1	Sans_Emploi	8	2	1	1500000	6	5	5	0	0	2	2	1	1	1	1	1	1	1	1	1	1	1	1	1	n/a	1	1	1	1	1	1	1	1	n/a	1	1	1	1	1	1	n/a	n/a	No	No	No
39	1	3	1	Profession_liberale	10	28	1	500000	6	5	4	0	1	2	1	1	1	1	1	1	1	1	1	1	1	0	0	2	n/a	1	0	1	1	1	1	0	2	n/a	1	0	1	1	1	0	2	n/a	No	No	No
35	1	2	2	Profession_liberale	7	4	1	1500000	6	5	4	0	1	2	2	1	1	1	1	1	1	0	0	0	0	0	0	2	n/a	1	0	1	1	1	1	1	2	n/a	1	0	1	1	0	0	2	n/a	No	No	No
33	1	2	1	Profession_liberale	7	6	1	1200000	6	5	4	0	1	2	2	1	1	1	0	0	0	0	1	1	0	0	0	2	n/a	0	0	1	1	0	0	0	2	n/a	0	1	1	1	1	1	2	n/a	Yes	No	No
40	1	1	1	Profession_liberale	3	6	1	900000	6	3	3	2	0	2	2	1	1	1	1	1	1	1	1	1	1	1	1	1	n/a	0	0	0	0	0	0	0	n/a	n/a	0	0	1	1	1	1	n/a	n/a	No	No	No
30	1	2	1	Profession_liberale	11	4	1	1500000	6	5	5	0	0	2	2	1	1	1	1	0	0	0	1	1	1	0	0	2	n/a	1	0	1	1	1	1	0	2	n/a	1	0	1	1	1	1	2	n/a	No	No	No
33	1	1	3	Profession_liberale	23	7	1	3000000	6	3	3	2	0	2	2	1	1	1	1	1	1	1	1	1	1	1	1	1	n/a	1	1	1	1	1	1	1	n/a	n/a	1	1	1	1	1	1	n/a	n/a	No	No	No
37	1	3	1	Sans_Emploi	15	32	1	0	6	5	4	0	1	2	2	1	1	1	1	1	1	1	1	1	0	0	0	2	n/a	1	0	1	0	1	1	0	2	n/a	1	1	1	1	1	0	2	n/a	Yes	No	No
29	1	3	5	Profession_liberale	13	11	2	800000	6	5	5	0	0	2	2	1	1	1	1	1	1	1	1	1	0	0	0	2	n/a	1	0	1	1	1	1	0	2	n/a	1	1	1	1	1	1	2	n/a	No	Yes	No
40	1	2	1	Profession_liberale	9	8	1	1000000	6	5	5	0	0	2	2	1	1	1	1	0	0	0	1	1	0	0	0	2	n/a	1	0	1	1	0	0	0	2	n/a	0	1	1	1	1	1	2	n/a	No	No	No
28	1	2	1	Profession_liberale	10	5	1	1000000	6	5	5	0	0	2	2	1	1	1	1	1	1	1	1	1	1	0	0	2	n/a	1	0	1	1	1	1	0	2	n/a	0	1	1	1	1	1	2	n/a	No	No	No
37	1	2	1	Profession_liberale	9	8	1	1200000	6	5	4	0	1	2	2	1	1	1	0	1	1	0	1	1	0	0	0	2	n/a	1	0	1	1	0	0	0	2	n/a	0	1	1	1	1	1	2	n/a	No	No	No
25	1	1	1	Profession_liberale	7	9	1	0	6	4	4	1	0	2	2	1	1	1	1	0	0	0	0	0	0	0	0	2	n/a	0	0	0	0	0	1	1	n/a	n/a	1	1	1	1	1	1	n/a	n/a	No	No	No
37	1	2	1	Sans_Emploi	5	5	1	1200000	6	4	4	1	0	2	2	1	1	1	1	1	0	0	0	1	1	0	0	2	n/a	1	1	1	1	1	1	0	2	n/a	1	1	1	1	1	1	2	n/a	No	No	No
33	1	1	1	Profession_liberale	9	6	1	1500000	6	5	5	0	0	2	2	1	1	1	1	1	1	1	1	1	1	1	1	1	n/a	1	1	1	1	1	1	1	n/a	n/a	1	1	1	1	1	1	n/a	n/a	No	No	No
30	1	1	4	Profession_liberale	8	7	1	1500000	6	4	4	1	0	2	2	1	1	1	1	1	1	1	1	1	1	1	1	1	n/a	1	1	1	1	1	1	1	n/a	n/a	1	1	1	1	1	1	1	n/a	No	No	No
36	1	2	3	Profession_liberale	7	5	1	1200000	6	5	5	0	0	2	2	1	1	1	1	1	1	0	0	1	1	1	0	2	n/a	1	0	1	1	1	1	0	2	n/a	1	1	1	1	1	1	2	n/a	No	No	No
30	1	2	1	Sans_Emploi	6	5	1	1200000	6	5	2	0	3	2	2	1	1	0	1	1	1	1	1	1	1	1	1	2	n/a	1	1	1	1	1	1	1	2	n/a	1	1	1	1	1	1	2	n/a	No	No	No
33	1	3	4	Sans_Emploi	9	36	2	0	6	5	5	0	0	2	2	1	1	1	1	1	1	1	1	1	1	1	1	2	n/a	1	1	1	1	1	1	1	2	n/a	1	1	1	1	1	1	2	n/a	No	No	No
39	1	4	1	Profession_liberale	15	32	2	500000	6	4	4	0	1	2	2	1	1	1	1	1	1	1	1	1	0	0	0	2	n/a	1	0	1	1	1	1	0	2	n/a	1	1	1	1	1	1	2	n/a	No	Yes	No
33	1	1	1	Sans_Emploi	4	6	1	0	6	4	4	1	0	2	2	1	1	1	1	1	1	0	1	1	1	1	1	1	n/a	1	1	1	1	1	1	1	n/a	n/a	1	1	1	1	1	1	n/a	n/a	Yes	No	No
35	1	2	3	Profession_liberale	6	7	1	1200000	6	4	4	1	0	2	2	1	1	1	1	1	1	0	0	1	1	0	0	2	n/a	1	0	1	1	1	1	1	2	n/a	1	0	1	1	1	1	2	n/a	No	No	No
39	1	2	5	Sans_Emploi	6	8	1	1500000	6	5	4	0	1	2	2	1	1	1	1	1	1	1	1	1	1	0	1	2	n/a	1	0	1	1	1	1	1	2	n/a	1	1	1	1	1	1	2	n/a	Yes	No	No
36	1	2	1	Profession_liberale	8	32	2	250000	7	6	4	1	1	2	2	1	1	1	1	0	0	1	1	1	0	0	0	2	n/a	0	0	1	1	1	1	0	2	n/a	1	0	1	1	1	0	2	n/a	No	No	No
30	1	3	1	Profession_liberale	11	36	1	300000	7	6	5	1	0	2	2	1	1	1	1	1	1	1	1	1	1	0	0	2	n/a	1	0	1	1	1	1	0	2	n/a	1	1	1	1	1	1	2	n/a	No	No	No
37	1	3	1	Sans_Emploi	12	36	2	0	7	6	5	0	1	2	2	1	1	1	1	1	1	1	1	1	0	0	0	2	n/a	1	0	1	1	1	1	0	2	n/a	1	1	1	1	1	1	2	n/a	No	No	No
38	1	3	1	Sans_Emploi	10	40	2	0	7	6	6	0	0	2	2	1	1	1	1	1	1	1	1	1	1	0	0	2	n/a	1	1	1	1	1	1	0	2	n/a	1	1	1	1	1	1	2	n/a	Yes	No	No
30	1	1	1	Profession_liberale	6	3	1	NA	7	4	4	2	0	2	2	1	1	0	0	0	0	0	0	0	0	0	0	2	n/a	0	0	0	0	0	0	0	2	n/a	0	0	0	0	0	0	n/a	n/a	No	No	No
38	1	2	1	Profession_liberale	8	5	1	1800000	7	6	6	0	0	2	2	1	1	1	1	1	0	0	1	1	1	0	0	2	n/a	1	0	1	1	0	0	1	2	n/a	0	0	1	1	1	1	2	n/a	Yes	No	No
32	1	1	1	Profession_liberale	11	1	1	900000	7	6	5	0	1	2	2	1	1	0	0	0	0	0	0	1	1	1	1	n/a	n/a	1	1	1	1	1	1	0	n/a	n/a	1	1	1	1	1	1	n/a	n/a	No	No	No
37	1	1	4	Sans_Emploi	4	5	1	0	7	6	4	0	2	2	2	1	1	1	1	1	1	1	1	1	1	1	1	1	n/a	1	1	1	1	1	1	1	n/a	n/a	1	1	1	1	1	1	n/a	n/a	No	No	No
40	1	1	1	Profession_liberale	6	6	1	0	7	5	5	1	0	2	2	1	1	1	1	1	1	1	1	1	1	1	1	1	n/a	1	1	1	1	1	1	1	n/a	n/a	1	1	1	1	1	1	n/a	n/a	No	No	No
37	4	3	1	Profession_liberale	9	36	2	50000	7	6	6	0	0	2	2	1	1	1	1	1	1	1	1	1	0	0	0	1	Hypersudation	1	1	1	1	1	1	0	2	n/a	1	1	1	1	1	1	2	n/a	No	No	No
36	1	4	1	Sans_Emploi	8	26	1	0	7	6	5	0	1	2	2	1	1	1	1	1	1	1	1	1	0	0	0	2	n/a	1	0	1	1	1	1	0	2	n/a	1	0	1	1	1	0	2	n/a	Yes	No	No
27	1	2	1	Profession_liberale	8	5	1	1800000	7	6	6	0	0	2	2	1	2	0	0	0	1	1	0	0	1	0	0	2	n/a	1	0	1	1	1	1	1	2	n/a	1	0	1	1	1	0	2	n/a	No	No	No
42	1	2	1	Profession_liberale	4	6	1	1200000	8	4	4	3	0	2	2	1	1	1	1	1	1	1	0	0	1	0	0	2	n/a	1	0	1	1	1	1	0	2	n/a	1	1	1	1	1	1	2	n/a	Yes	No	No
42	1	2	1	Sans_Emploi	10	9	1	1200000	8	7	7	0	0	2	2	1	1	1	1	1	1	0	1	1	1	0	0	2	n/a	1	0	1	1	1	1	0	2	n/a	1	0	1	1	1	1	2	n/a	No	No	No
28	1	1	4	Profession_liberale	6	5	1	50000	8	4	4	4	0	2	2	1	1	1	1	1	1	1	1	1	1	1	1	n/a	n/a	1	1	1	1	1	1	0	n/a	n/a	1	1	1	1	1	1	n/a	n/a	No	No	No
35	1	1	1	Profession_liberale	6	5	1	0	8	7	4	0	3	2	1	1	1	1	1	1	1	1	1	1	1	1	1	n/a	n/a	1	1	1	1	1	1	1	n/a	n/a	1	1	1	1	1	1	2	n/a	No	No	No
40	1	1	3	Profession_liberale	5	8	1	1500000	8	6	6	0	1	2	2	1	1	1	1	1	1	1	1	1	1	0	1	n/a	n/a	1	1	1	1	1	1	1	n/a	n/a	0	1	1	1	1	1	n/a	n/a	No	No	No
34	1	1	4	Fonctionnaire	7	2	1	4500000	9	3	3	6	0	2	2	1	1	1	1	1	1	1	1	1	1	1	1	n/a	n/a	1	1	1	1	1	1	1	n/a	n/a	1	1	1	1	1	1	n/a	n/a	Yes	No	No
35	1	1	1	Profession_liberale	9	6	1	0	11	7	7	4	0	2	2	1	1	1	1	1	1	1	1	1	1	1	1	n/a	n/a	1	1	1	1	1	1	1	n/a	n/a	1	1	1	1	1	1	1	n/a	No	No	No
[truncated: 53 more columns]
